# Supplementary material for: Synthesis, Antiphospholipase A2, Antiprotease, Antibacterial Evaluation and Molecular Docking Analysis of Certain Novel Hydrazones
Source: MDPI journal article supplement (doi:10.3390/molecules21121664), 2016-12-02
Supplement: s1 [file s1]

# Supplementary Materials: Synthesis, Antiphospholipase A<sub>2</sub>, Antiprotease, Antibacterial Evaluation and Molecular Docking Analysis of Certain Novel Hydrazones

Nahed N. E. El-Sayed, Ahmed M. Alafeefy, Mohammed A. Bakht, Vijay H. Masand, Ali Aldalbahi, Nan Chen, Chunhai Fan and Abir Ben Bacha

Table S1. Inhibitory activity of compounds 6a–o against sPLA<sub>2</sub> (hG-IIA and DrG-IB).

| Compound | sPLA <sub>2</sub> Inhibitory Activity (%) |              |
|----------|-------------------------------------------|--------------|
|          | hG-IIA                                    | DrG-IB       |
| 6a       | 39.67 ± 2.51                              | 2.66 ± 2.51  |
| 6b       | 37.33 ± 4.04                              | 11.67 ± 3.51 |
| 6c       | 50.67 ± 4.04                              | 14.67 ± 2.51 |
| 6d       | 55.67 ± 4.72                              | 10 ± 3.00    |
| 6e       | 72.67 ± 2.51                              | 4.66 ± 0.57  |
| 6f       | 37.33 ± 3.51                              | 6.33 ± 0.57  |
| 6g       | 10.67 ± 0.57                              | 9 ± 1.73     |
| 6h       | 15.33 ± 2.51                              | 8.33 ± 1.15  |
| 6i       | 26.67 ± 3.21                              | 5.66 ± 1.52  |
| 6j       | 19.33 ± 2.08                              | 6.66 ± 1.52  |
| 6k       | 35.33 ± 3.51                              | 6.66 ± 2.08  |
| 6l       | 74.33 ± 3.21                              | 11.33 ± 2.51 |
| 6m       | 17.67 ± 3.05                              | 2.66 ± 1.15  |
| 6n       | 9 ± 2                                     | 4 ± 3.60     |
| 6o       | 12.67 ± 3.21                              | 1.66 ± 1.15  |

Table S2. Antiprotease activity (%) of compounds 6a–o against different protease enzymes.

| Compound | Anti-Protease Activity (%) |                                   |              |
|----------|----------------------------|-----------------------------------|--------------|
|          | Proteinase K               | Protease from <i>Bacillus sp.</i> | Esperase     |
| 6a       | 27.33 ± 2.51               | 40.66 ± 4.04                      | 6.66 ± 1.52  |
| 6b       | 55.66 ± 5.03               | 72.33 ± 2.51                      | 13 ± 2.00    |
| 6c       | 34.66 ± 2.51               | 51 ± 3.60                         | 15 ± 3.00    |
| 6d       | 26.33 ± 3.21               | 38 ± 2.64                         | 20.66 ± 3.05 |
| 6e       | 74.66 ± 2.51               | 57 ± 4.00                         | 31.33 ± 6.02 |
| 6f       | 39 ± 4.58                  | 44 ± 1.00                         | 12.33 ± 2.08 |
| 6g       | 57.33 ± 2.51               | 72.33 ± 6.42                      | 24 ± 3.60    |
| 6h       | 14.66 ± 3.51               | 7.66 ± 2.51                       | 5 ± 1.00     |
| 6i       | 30.66 ± 5.50               | 42 ± 6.55                         | 14 ± 2.64    |
| 6j       | 35 ± 3.60                  | 48.33 ± 3.51                      | 17.66 ± 3.51 |
| 6k       | 50.66 ± 4.04               | 62.33 ± 2.51                      | 24.33 ± 4.04 |
| 6l       | 86 ± 2.64                  | 74.66 ± 2.88                      | 39.33 ± 3.21 |
| 6m       | 69 ± 4.58                  | 56.33 ± 3.51                      | 32.33 ± 2.08 |
| 6n       | 44.66 ± 6.50               | 50 ± 2.64                         | 21.33 ± 3.51 |
| 6o       | 26 ± 4.58                  | 41 ± 3.00                         | 34.33 ± 3.05 |

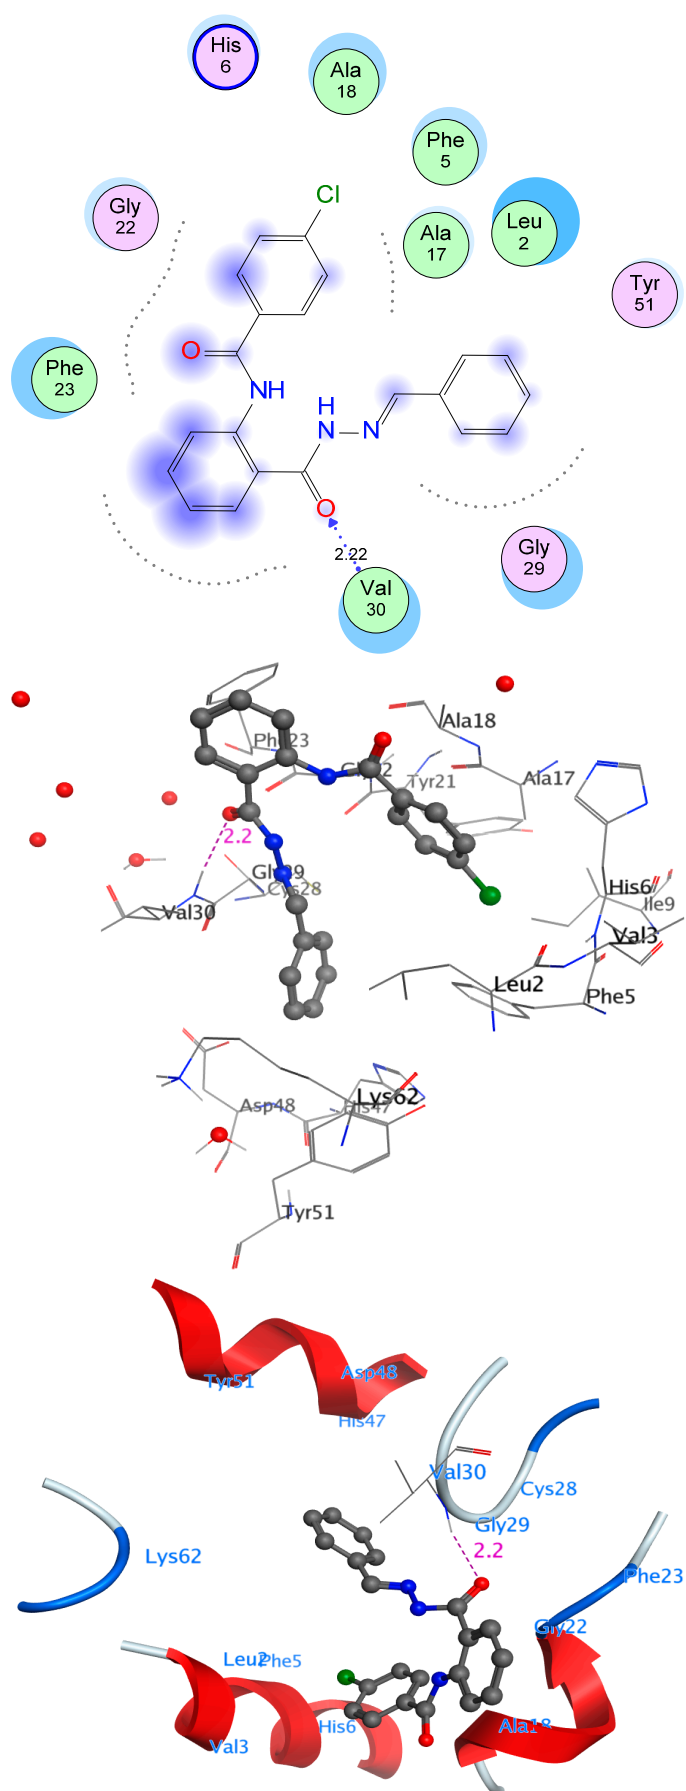Docking Pose for Compound 6a in the Active Site of GIIAsPLA<sub>2</sub>

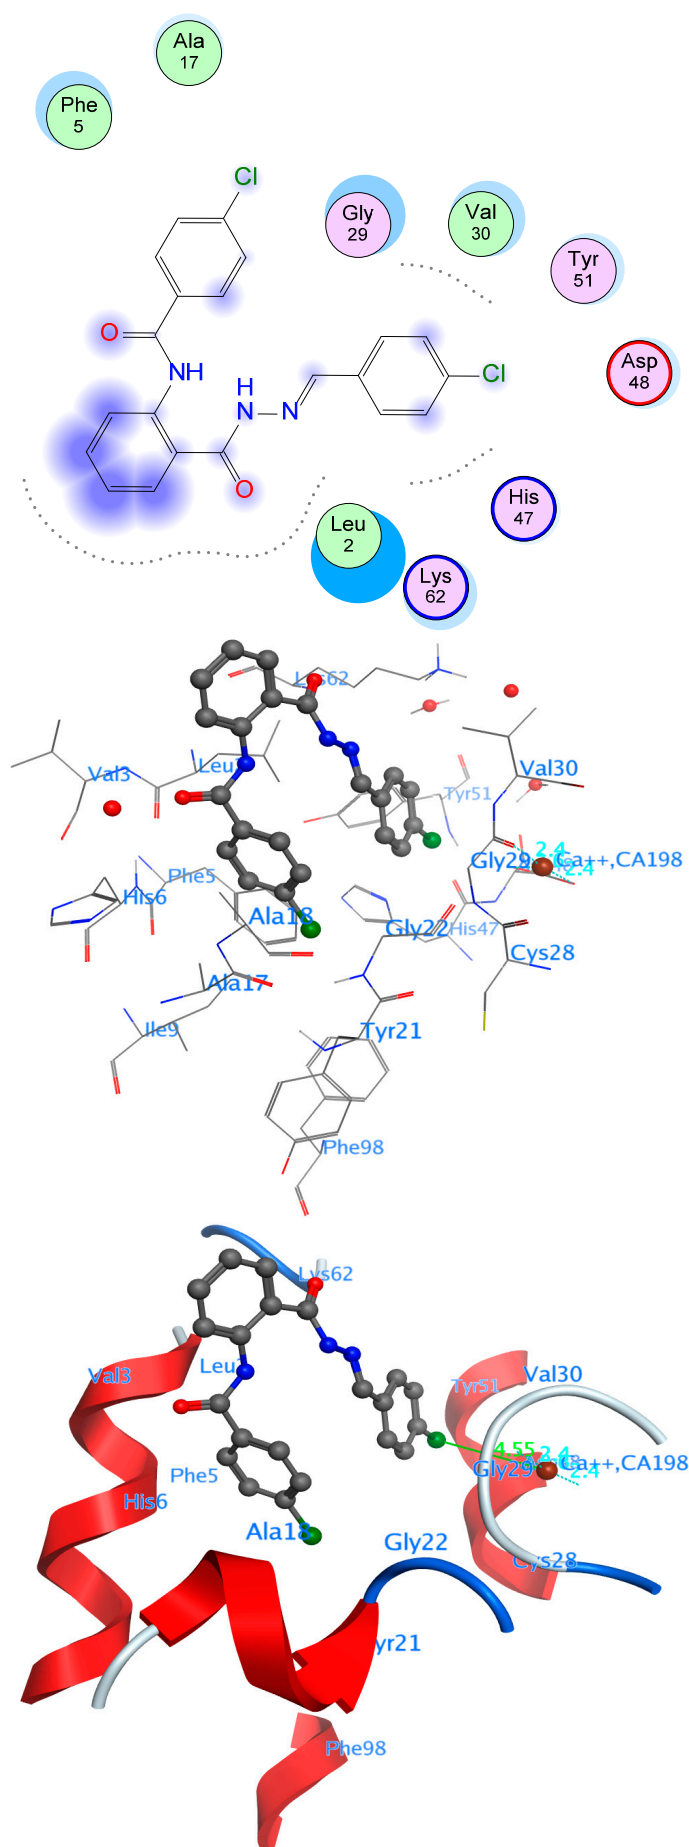Docking pose for compound **6b** in the active site of GIIAsPLA<sub>2</sub>

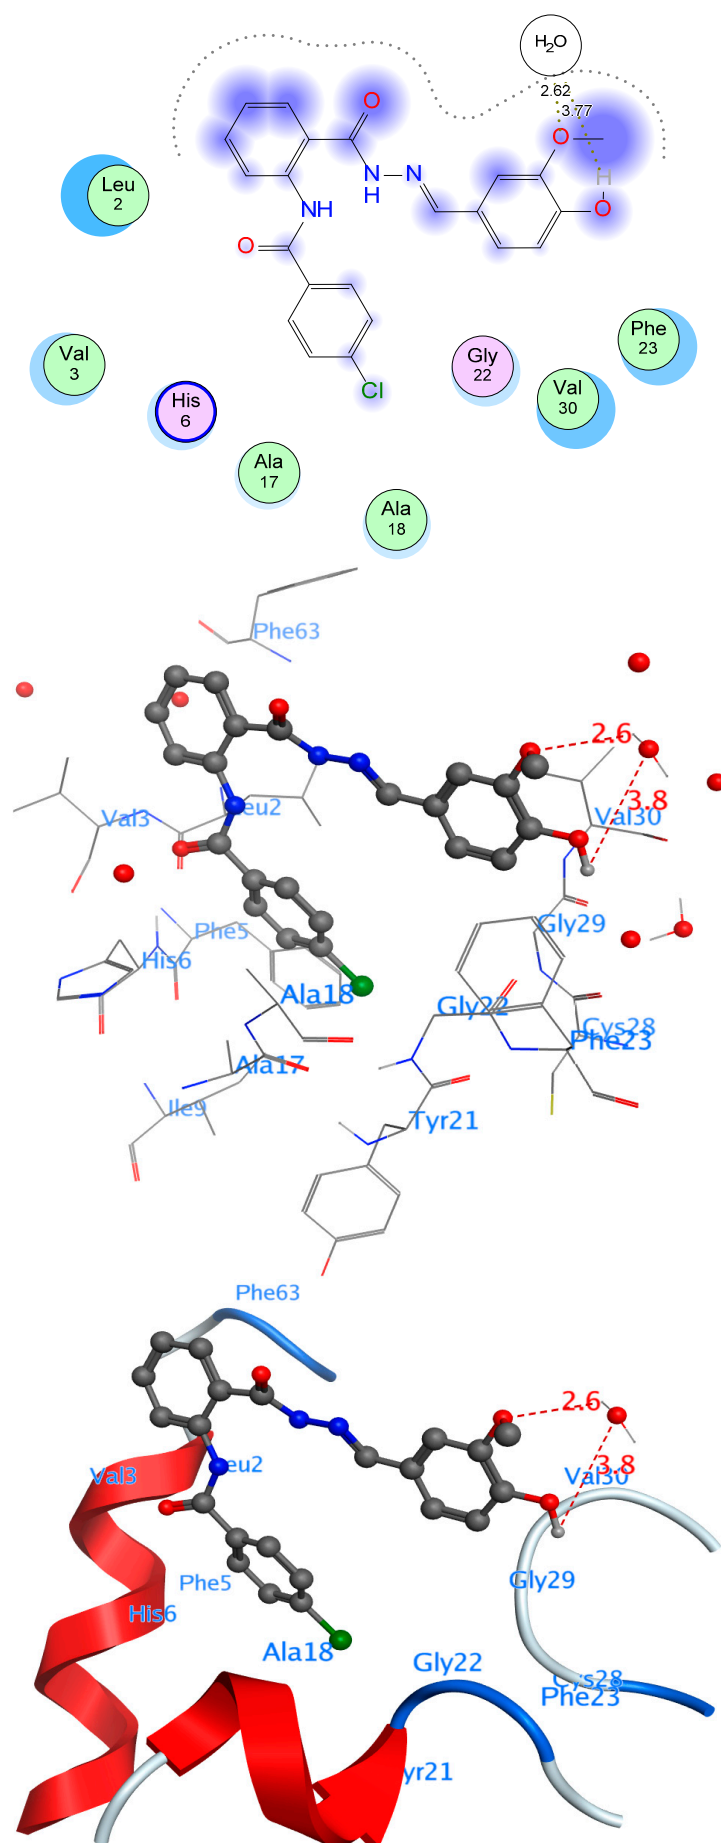Docking pose for compound **6c** in the active site of GIIAsPLA<sub>2</sub>



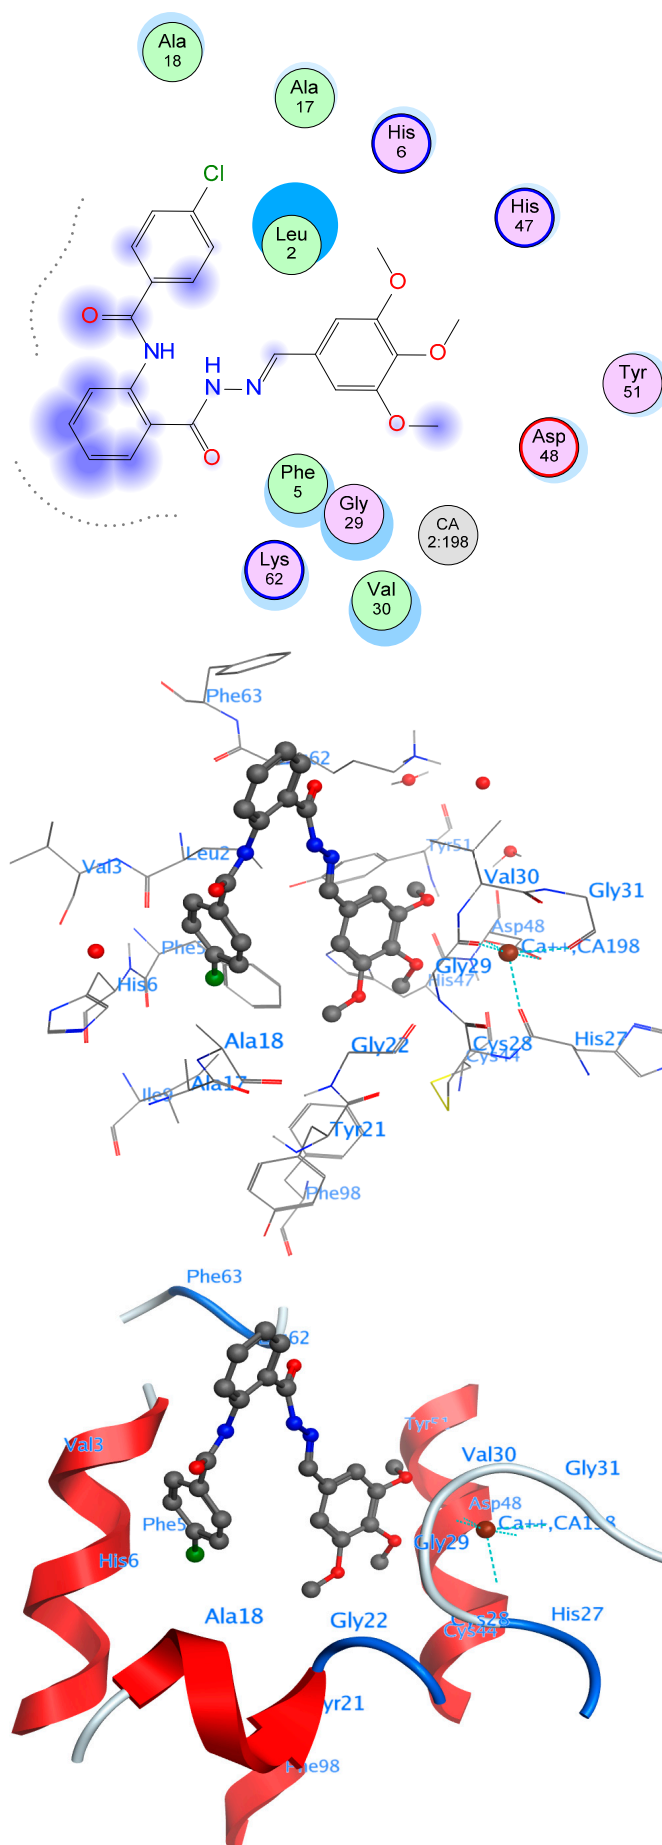Docking pose for compound **6d** in the active site of GIIAsPLA<sub>2</sub>

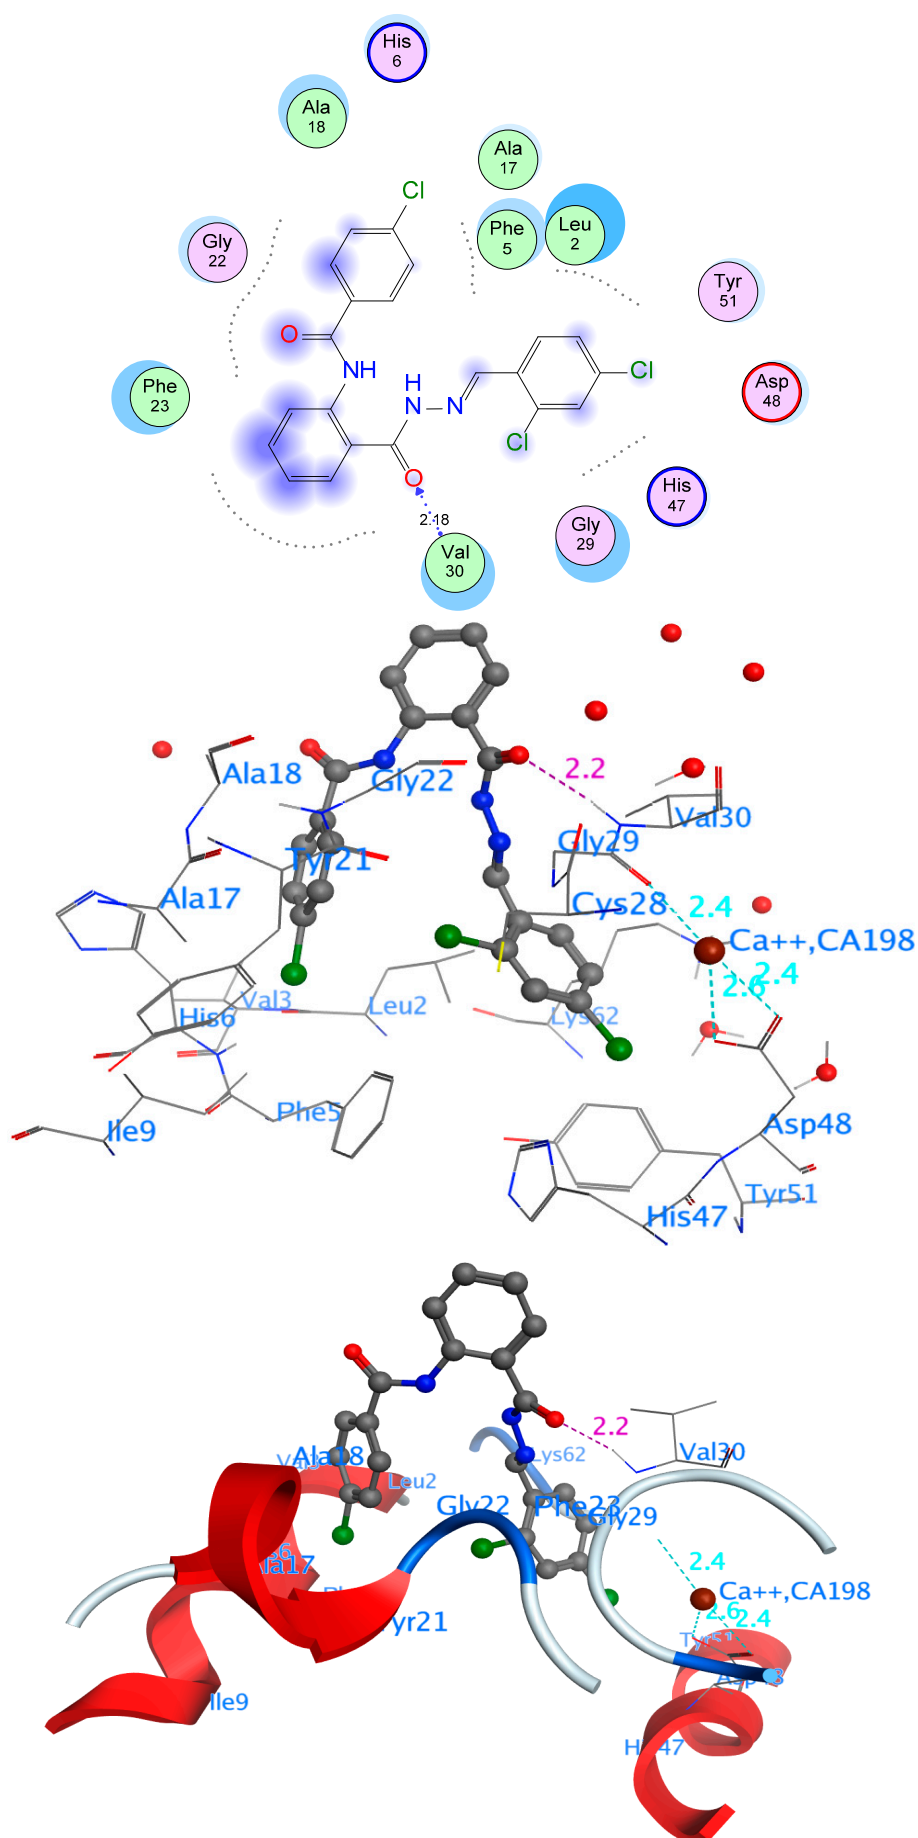Docking pose for compound **6e** in the active site of GIIAsPLA2

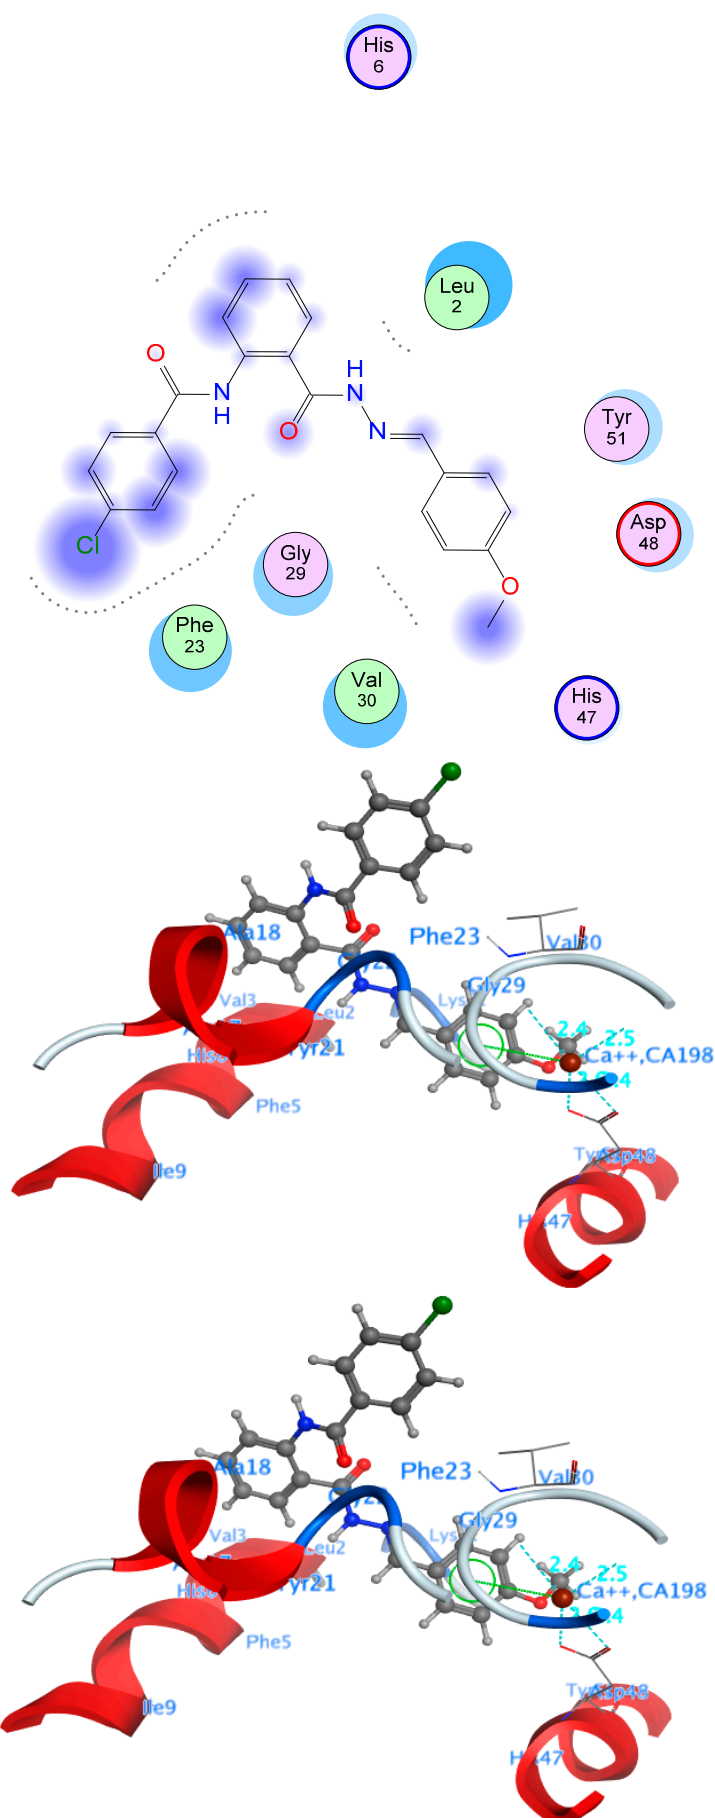Docking pose for compound **6f** in the active site of GIIAsPLA<sub>2</sub>

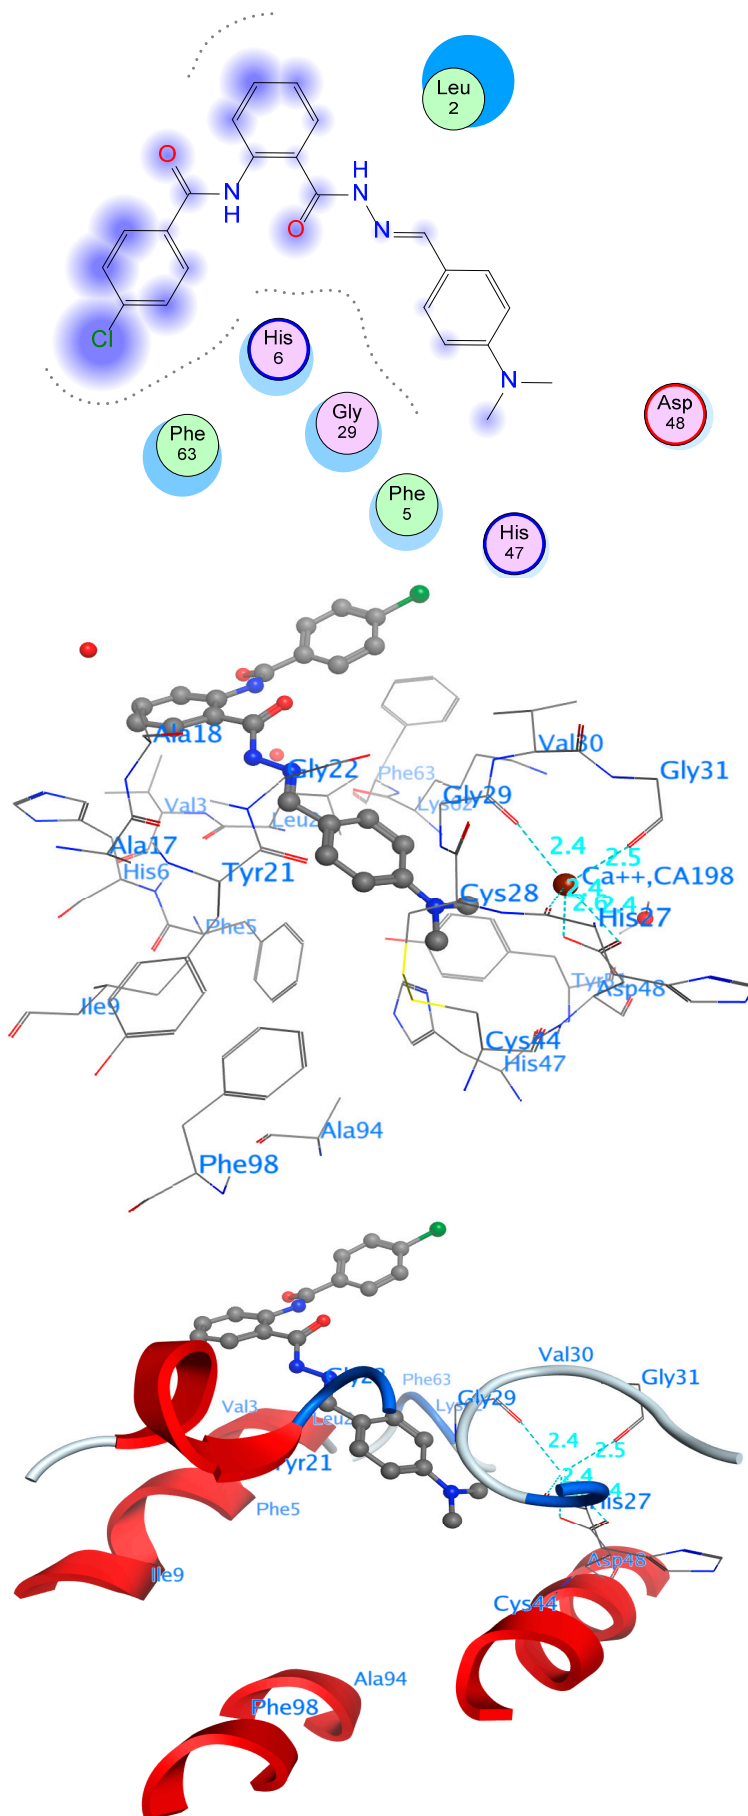Docking pose for compound **6g** in the active site of GIIAsPLA<sub>2</sub>

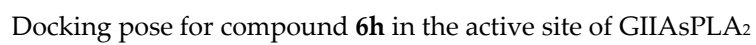

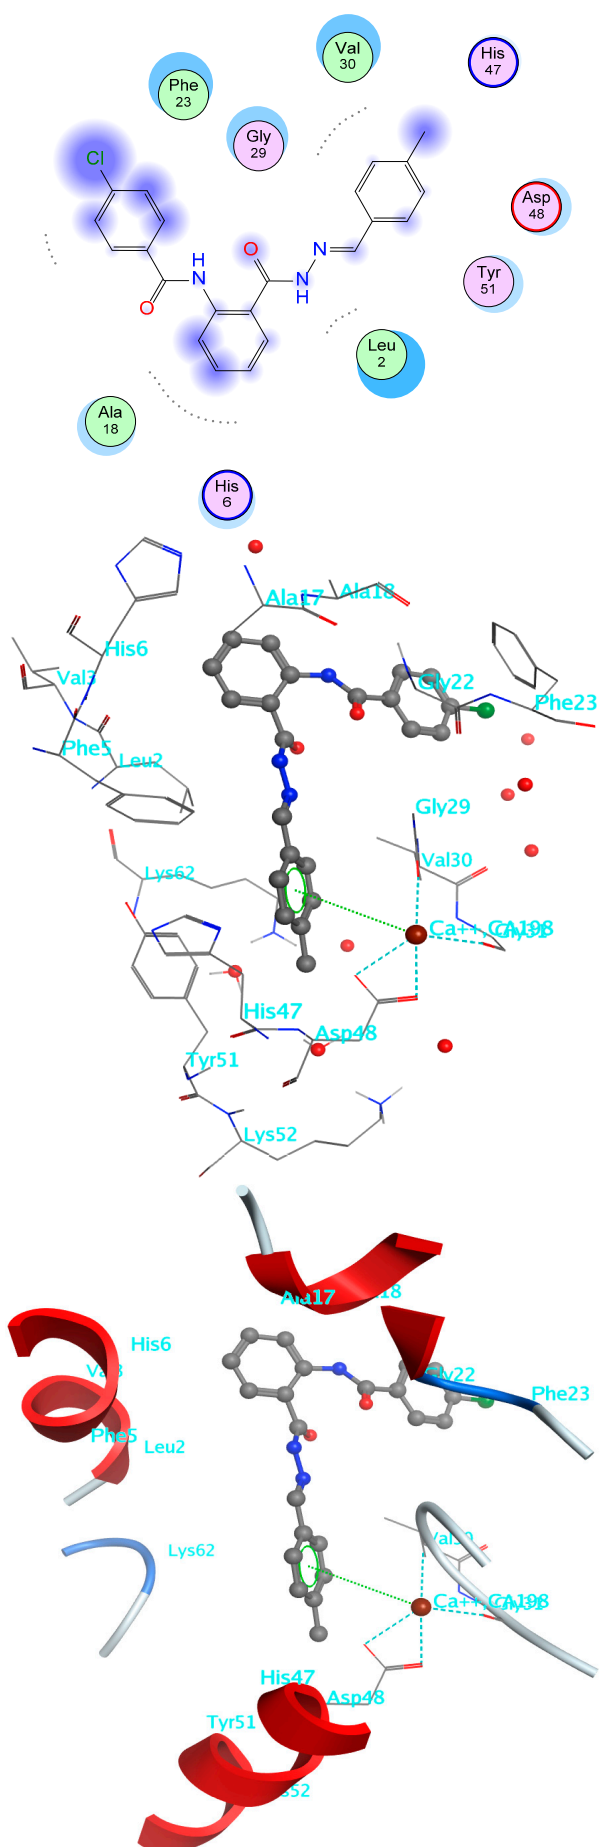Docking pose for compound **6i** in the active site of GIIAsPLA<sub>2</sub>

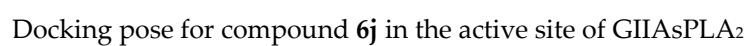

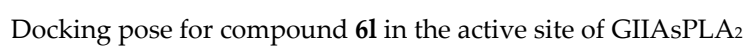



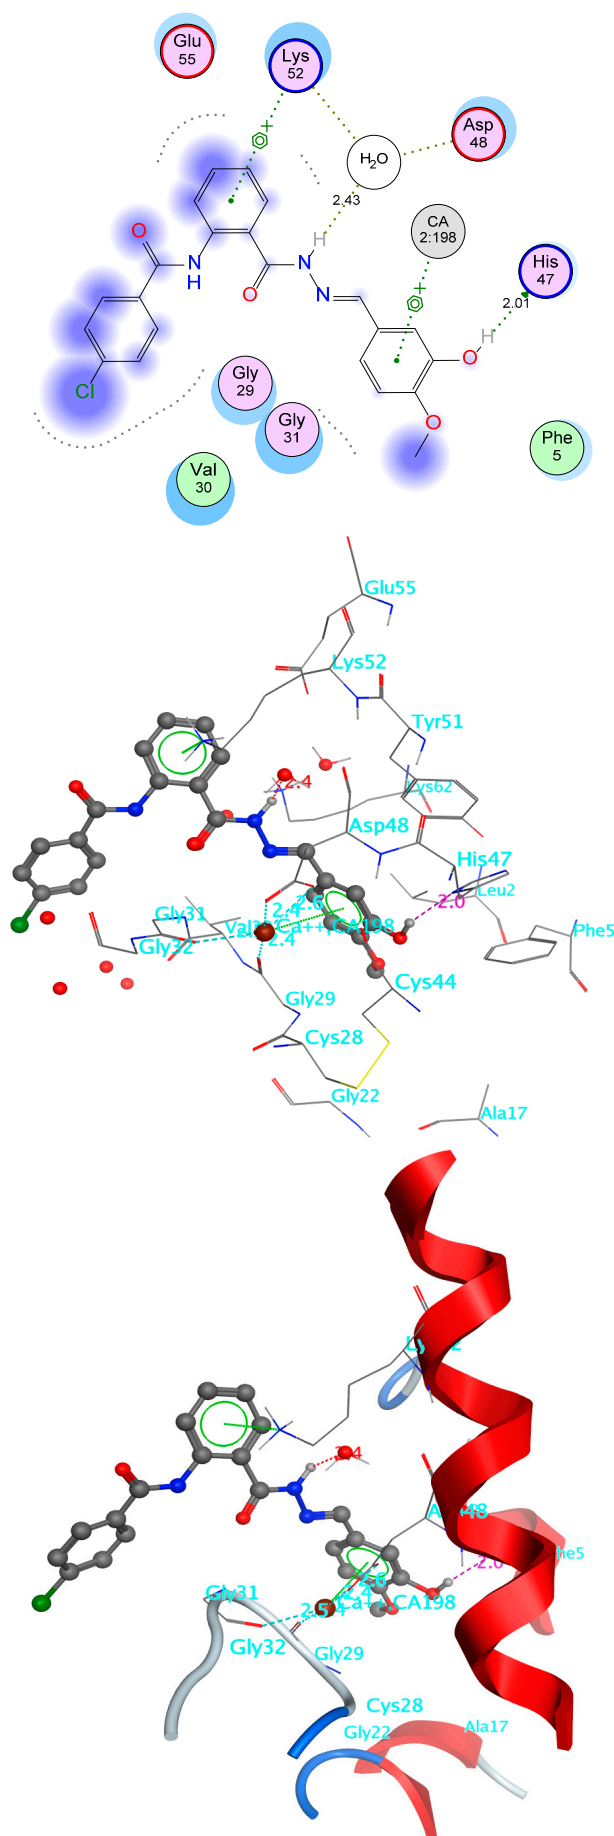Docking pose for compound **6m** in the active site of GIIAsPLA<sub>2</sub>

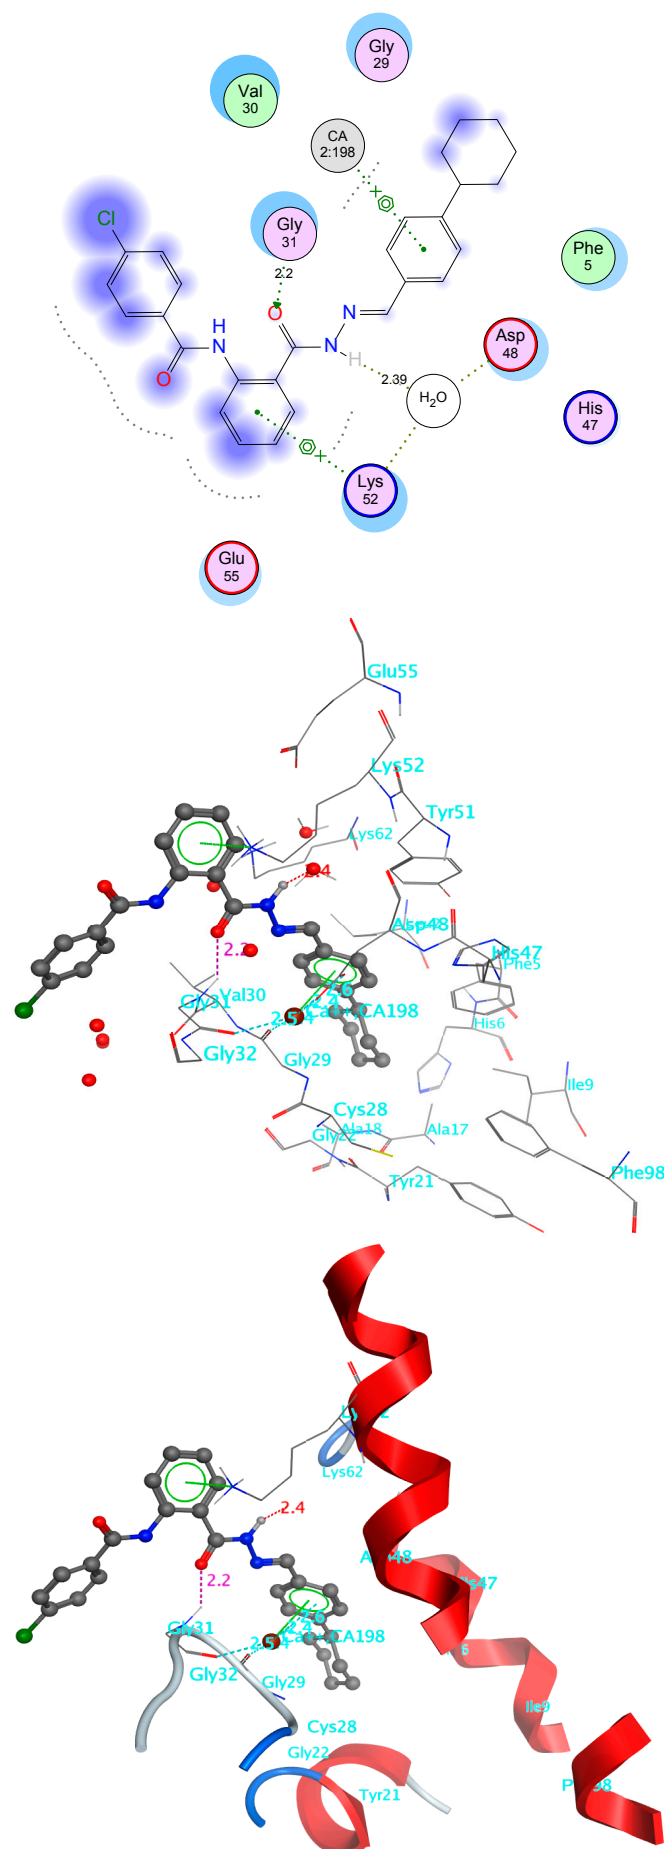Docking pose for compound **6n** in the active site of GIIAsPLA<sub>2</sub>

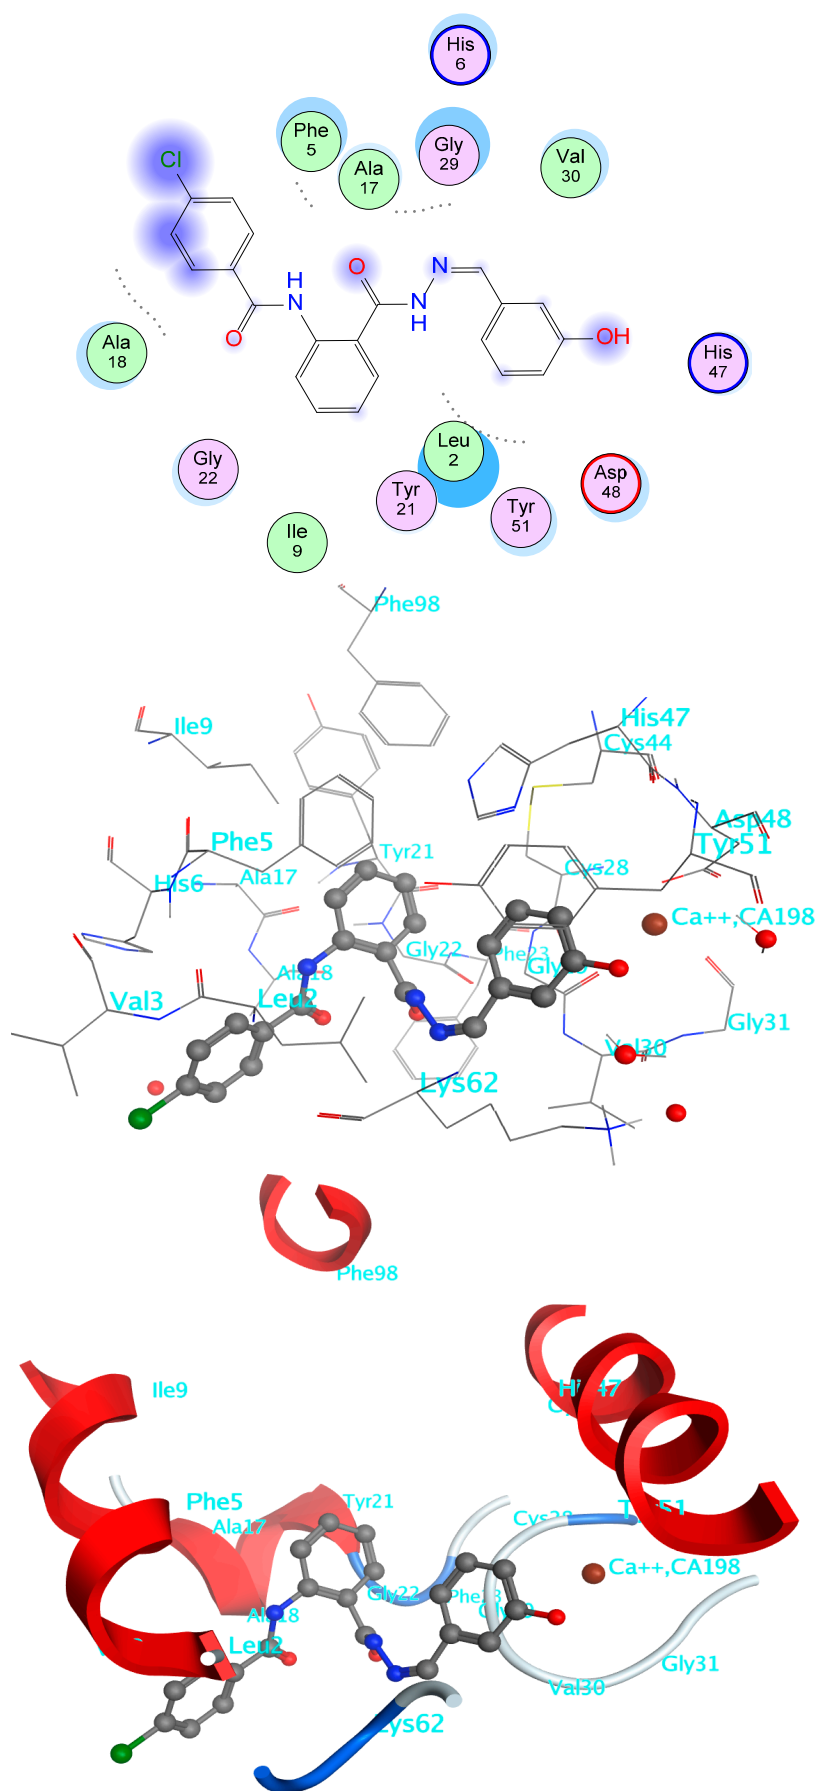

Docking pose for compound **60** in the active site of GIIAsPLA<sub>2</sub>

**Figures S1.** Docking poses of compounds **6a–o** in active site of GIIAsPLA<sub>2</sub>.

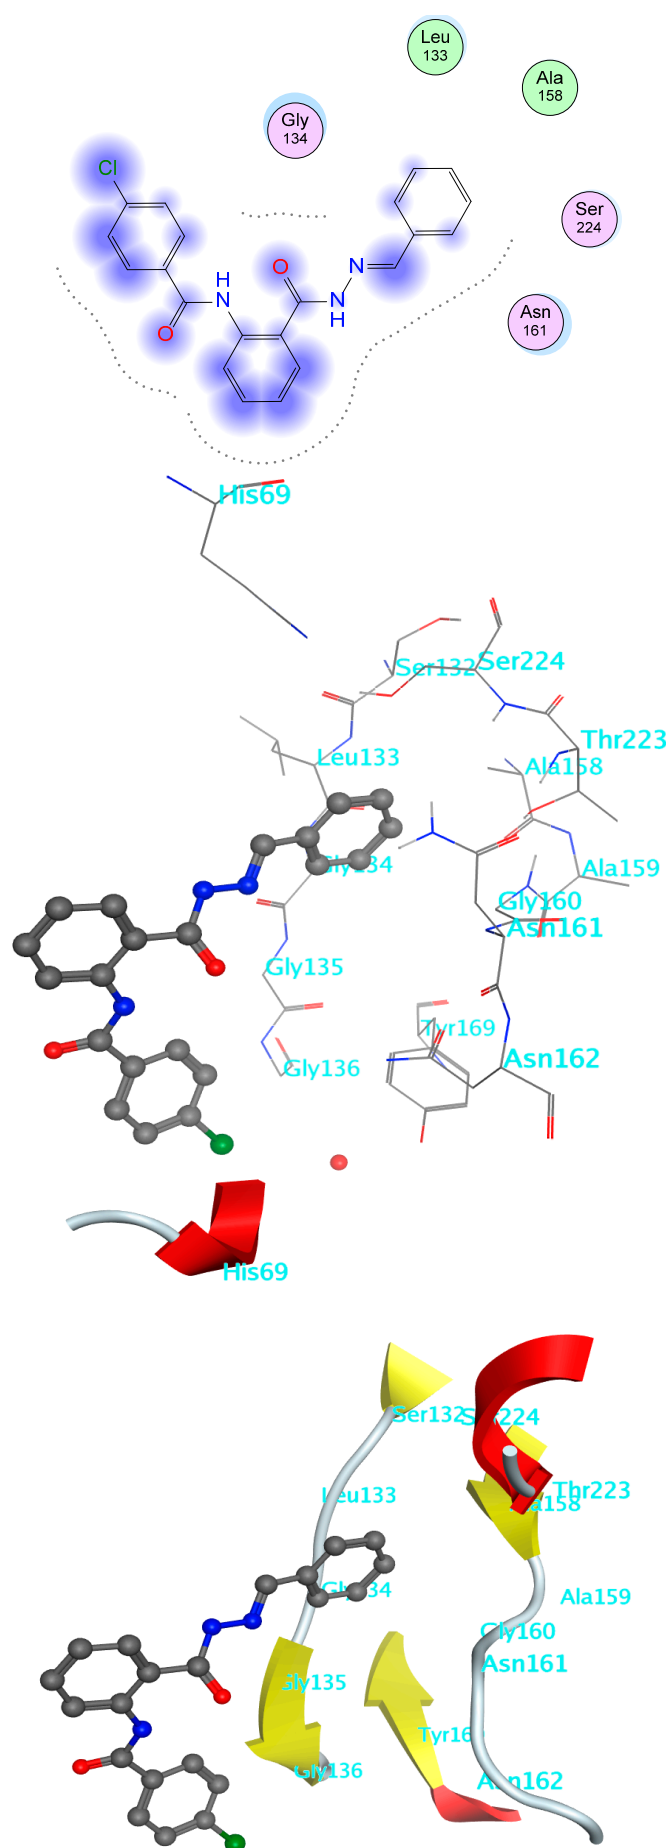Docking pose for compound **6a** in the active site of Proteinase K

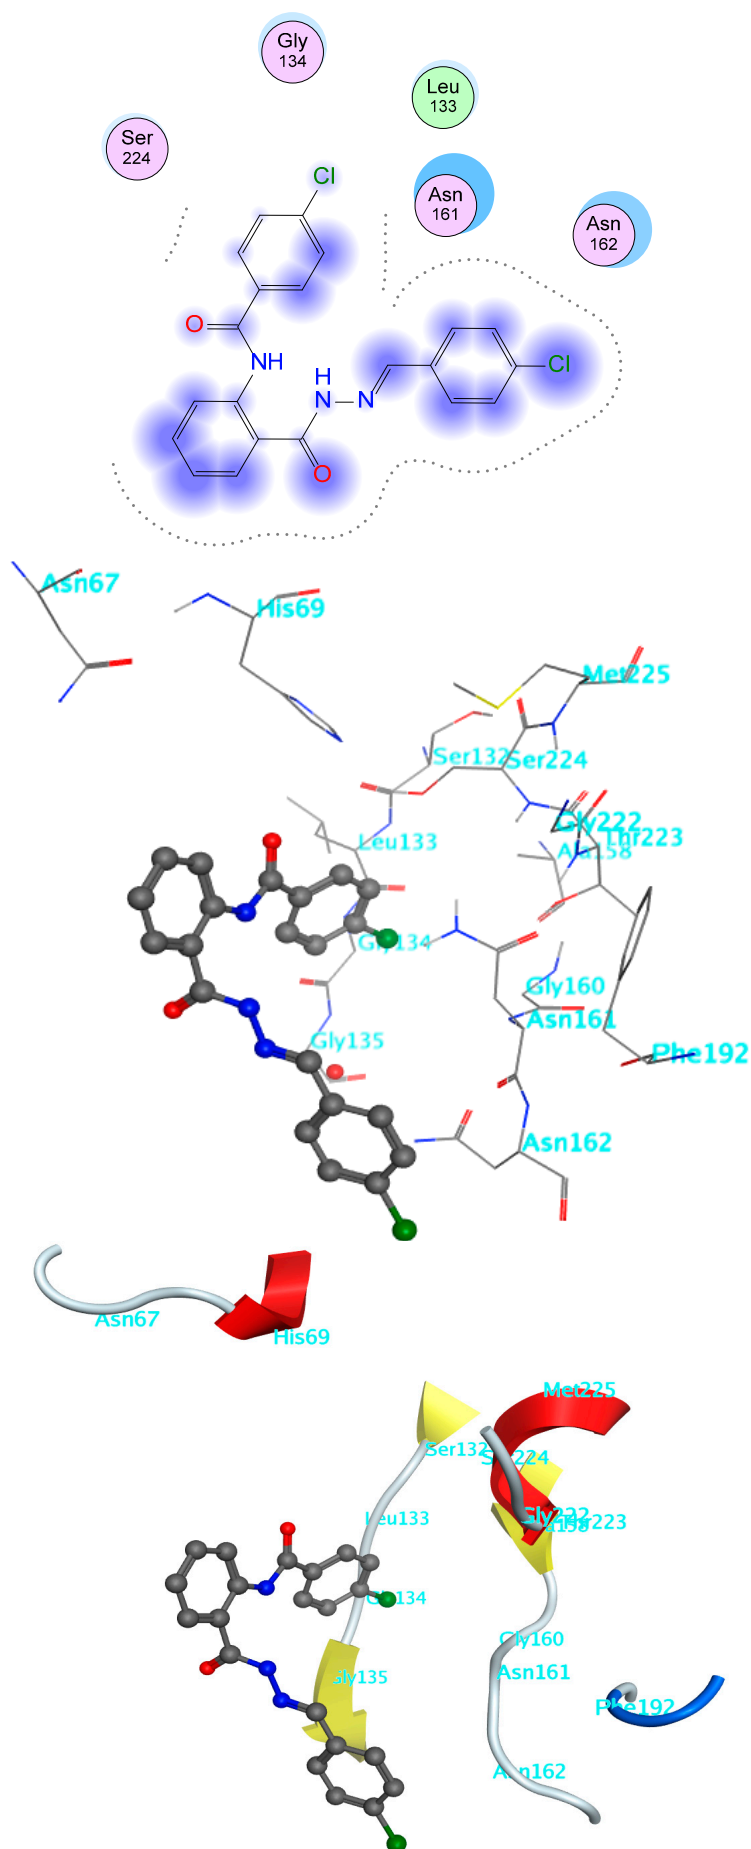Docking pose for compound **6b** in the active site of Proteinase K

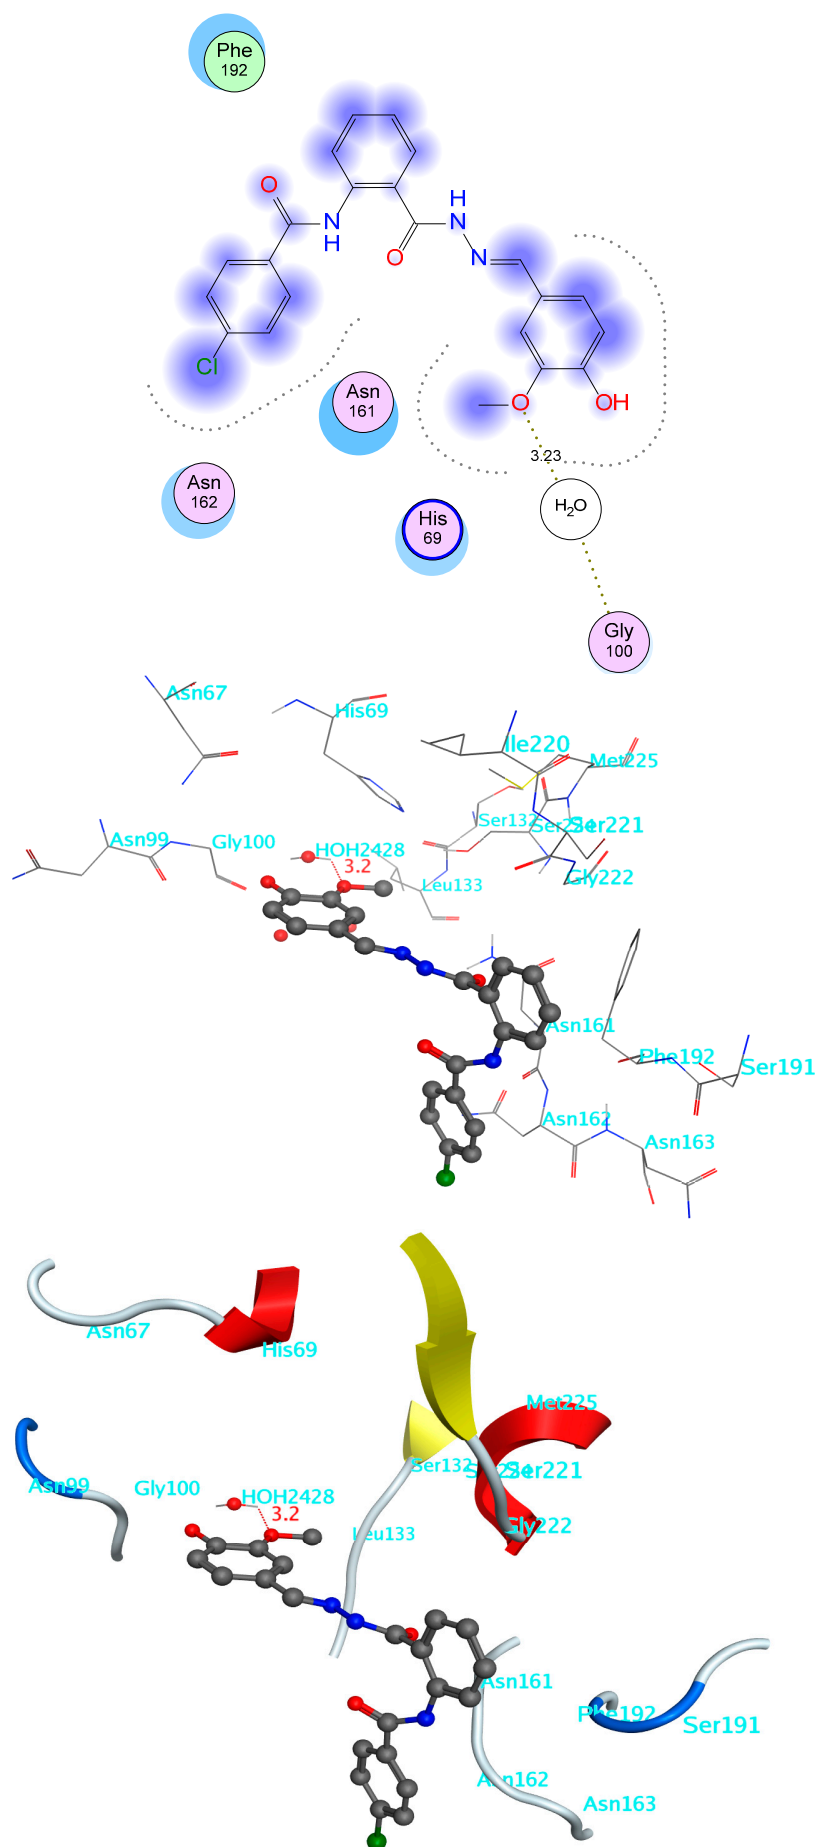Docking pose for compound **6c** in the active site of Proteinase K

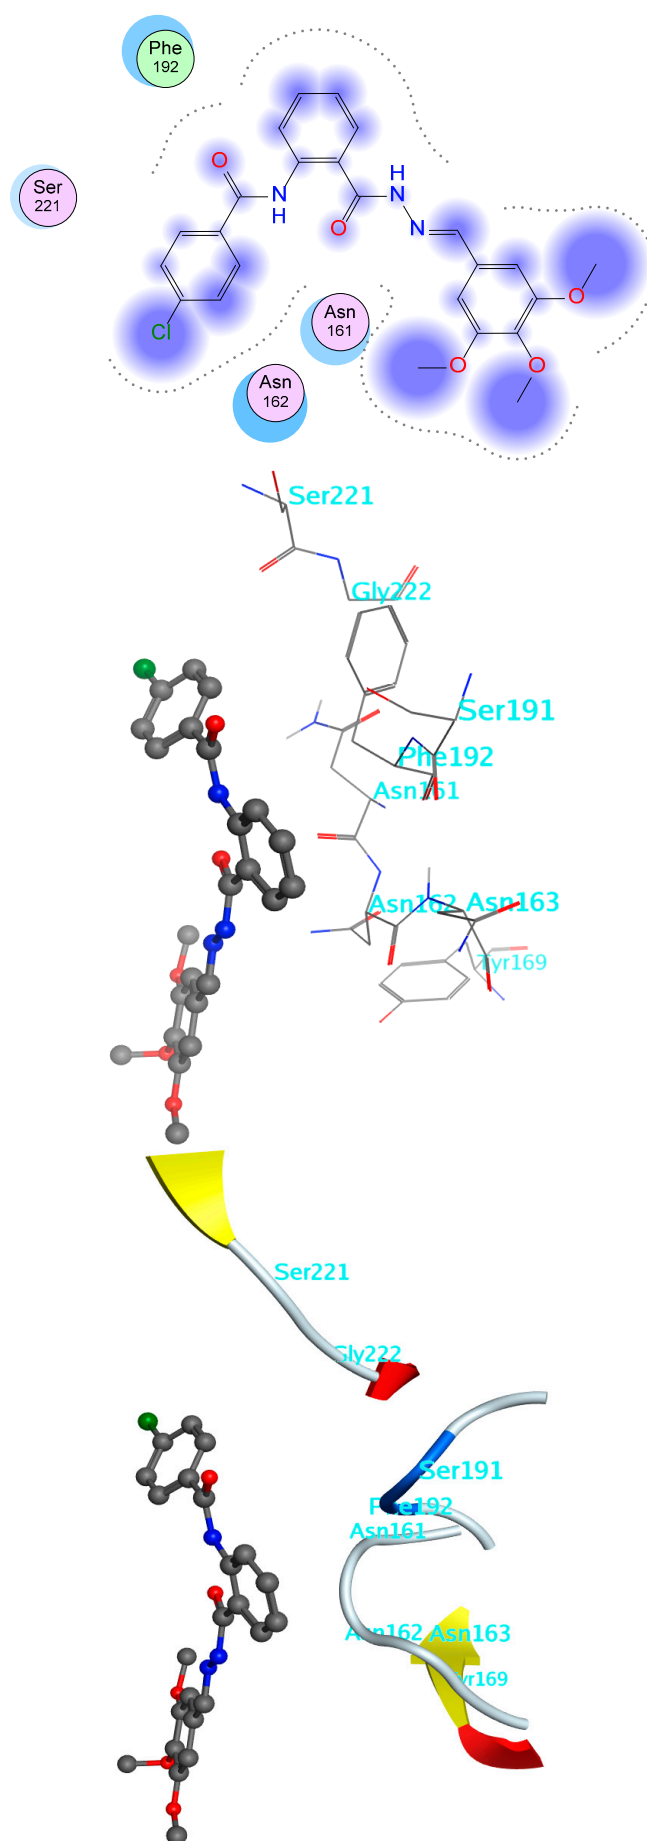Docking pose for compound **6d** in the active site of Proteinase K

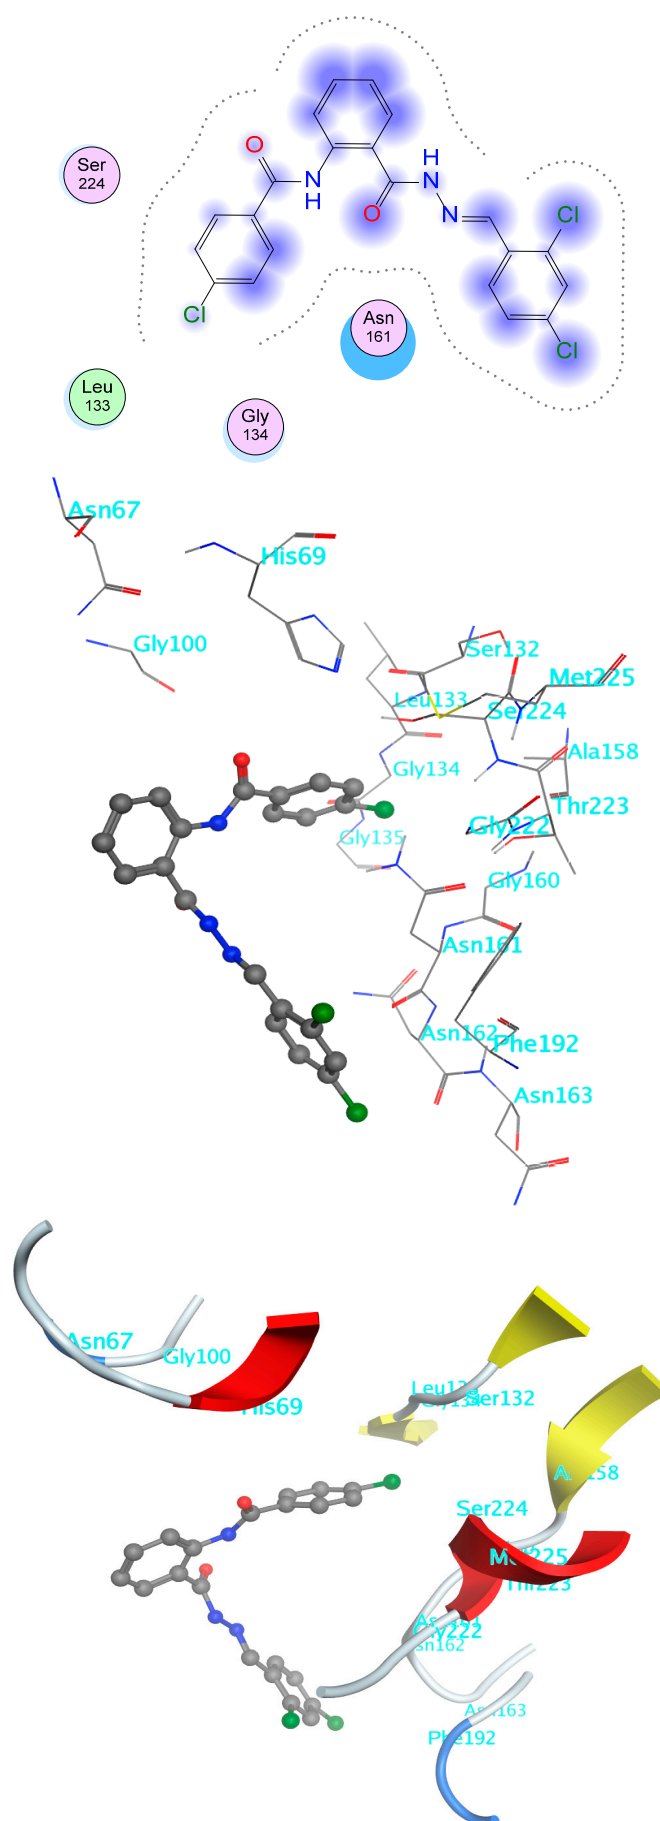Docking pose for compound **6e** in the active site of Proteinase K



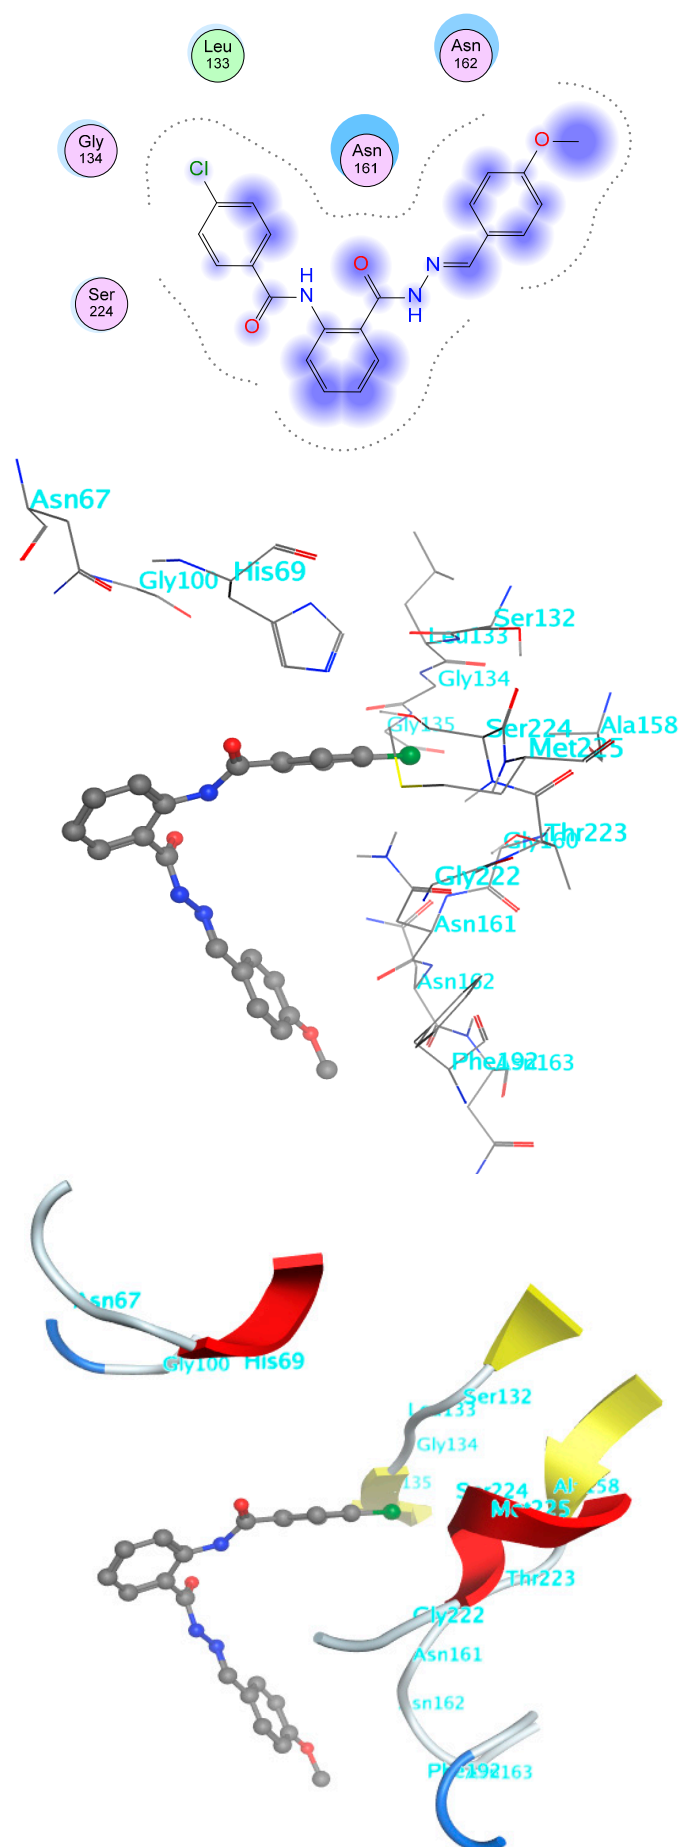Docking pose for compound **6f** in the active site of Proteinase K

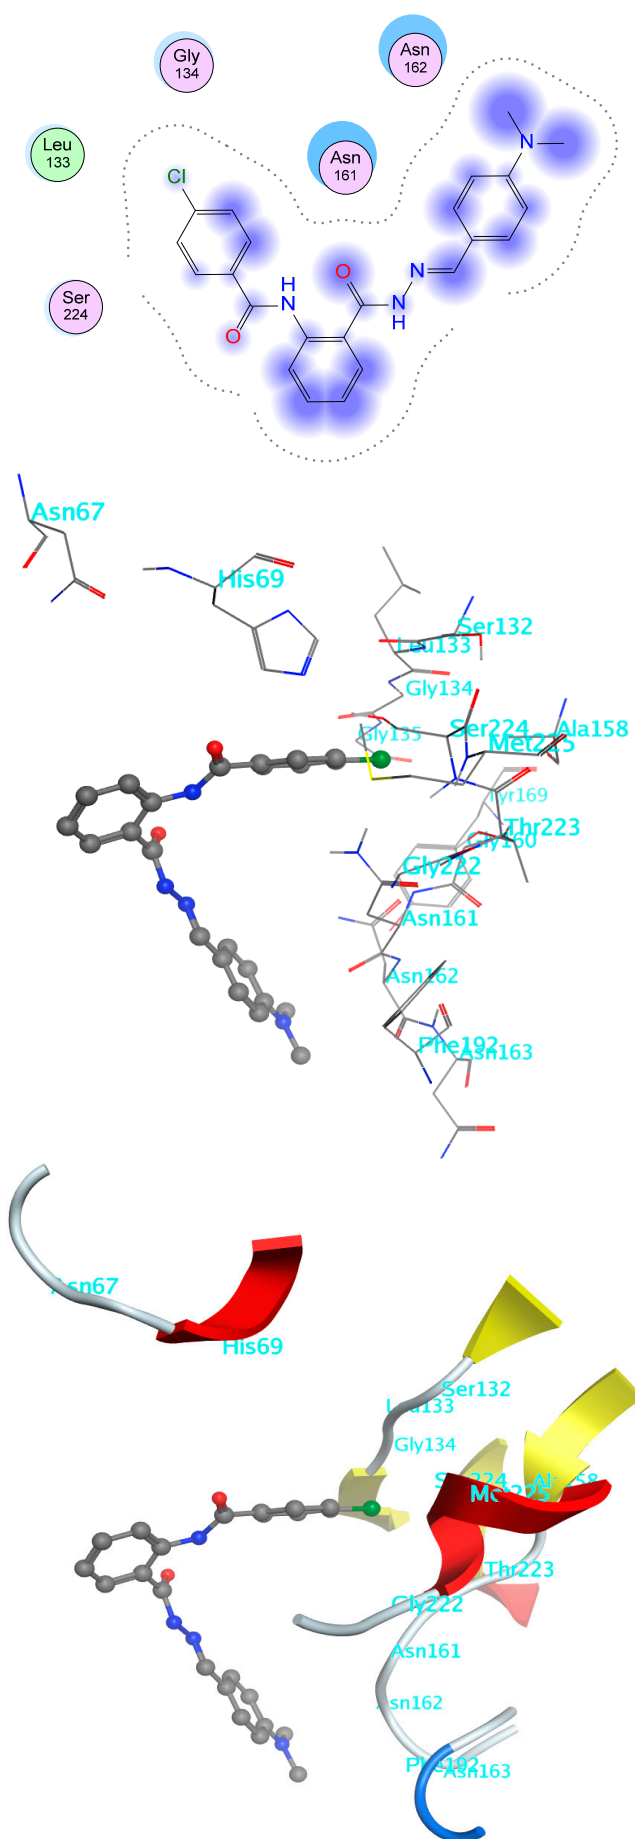Docking pose for compound **6g** in the active site of Proteinase K

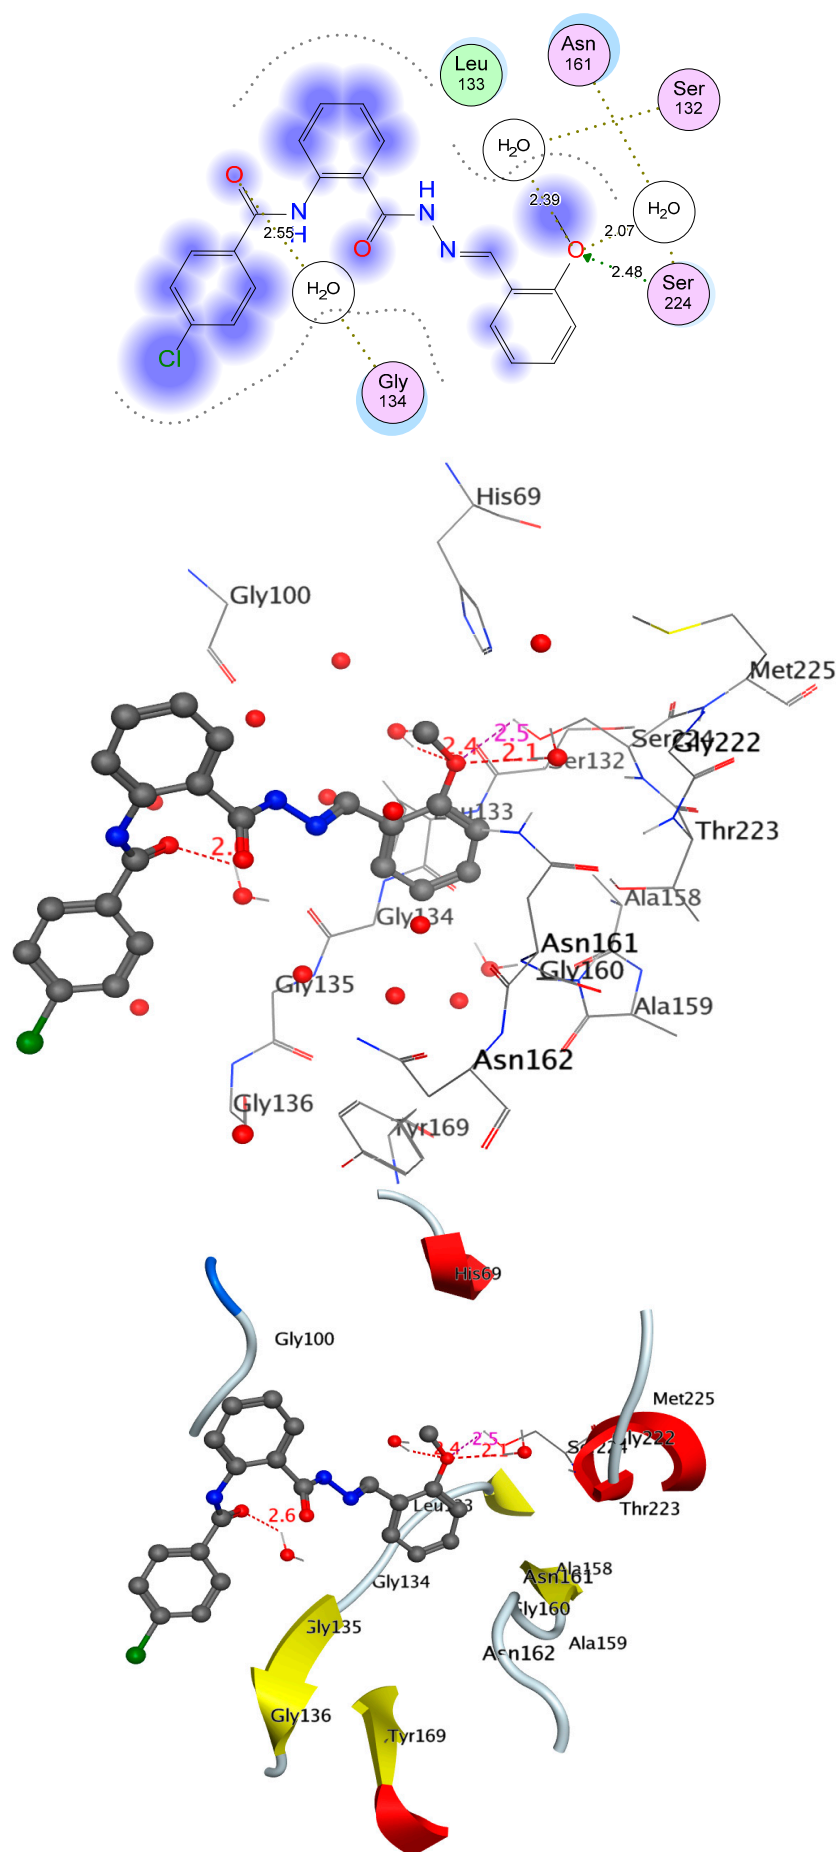Docking pose for compound **6h** in the active site of Proteinase K

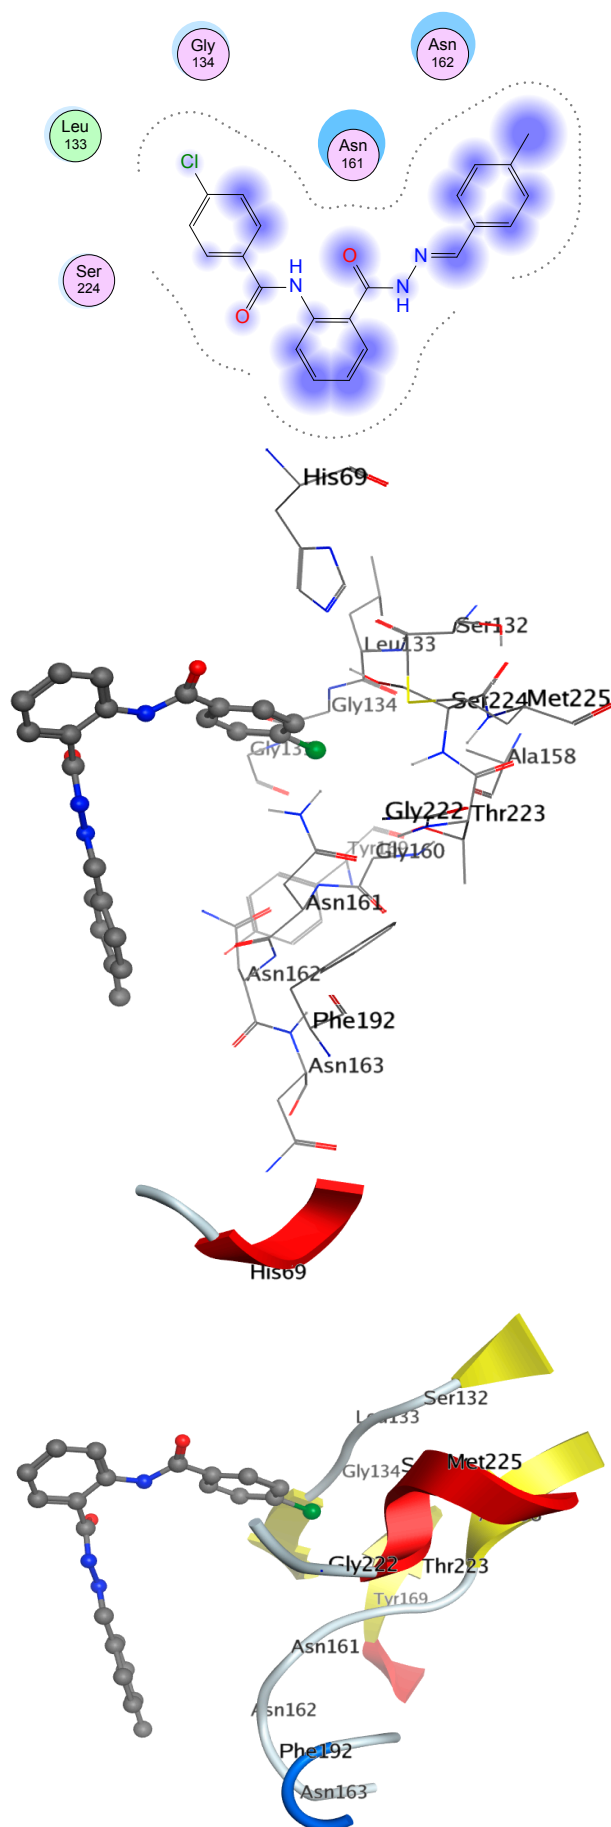Docking pose for compound **6i** in the active site of Proteinase K

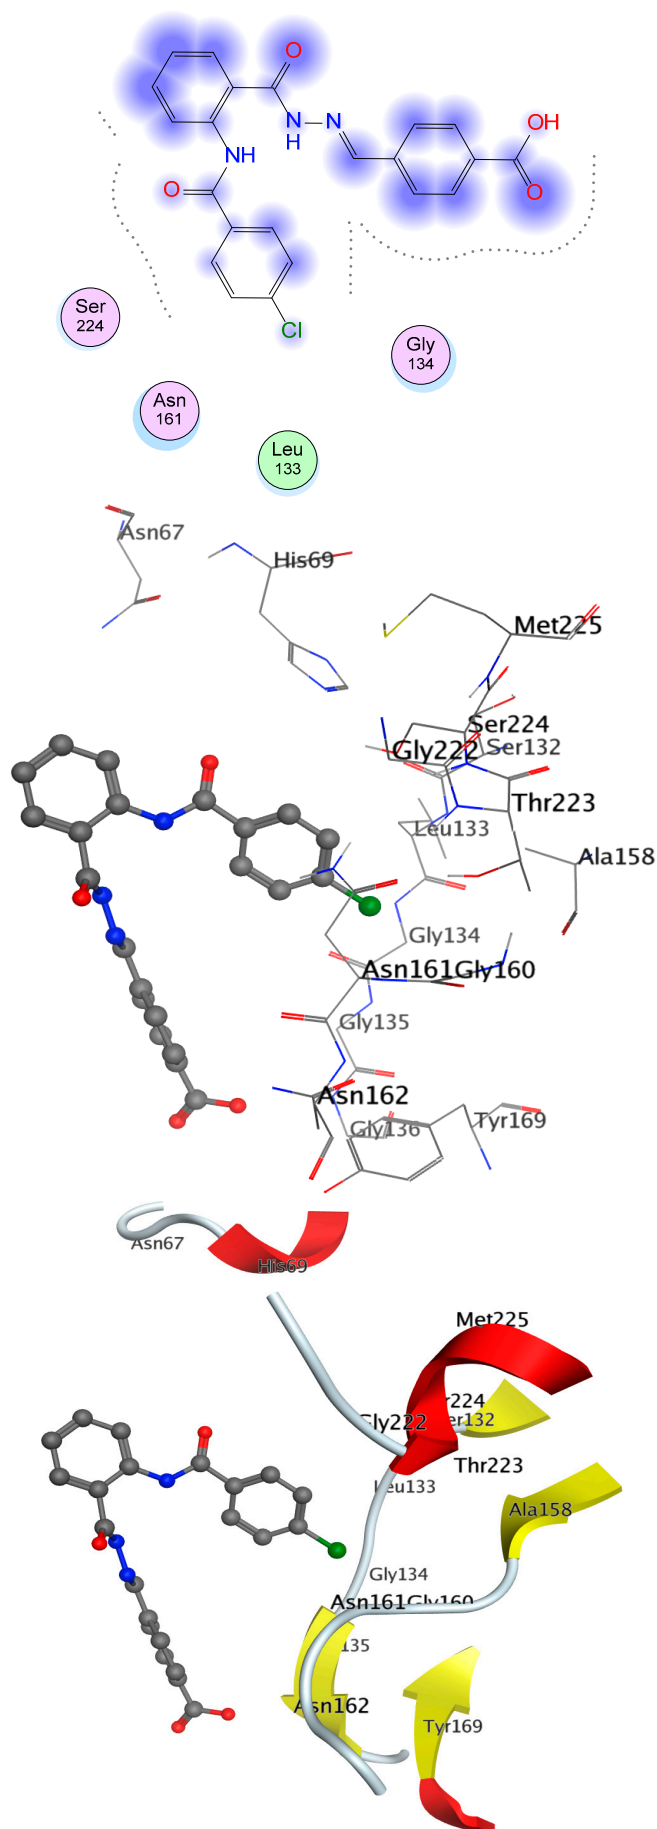Docking pose for compound **6j** in the active site of Proteinase K

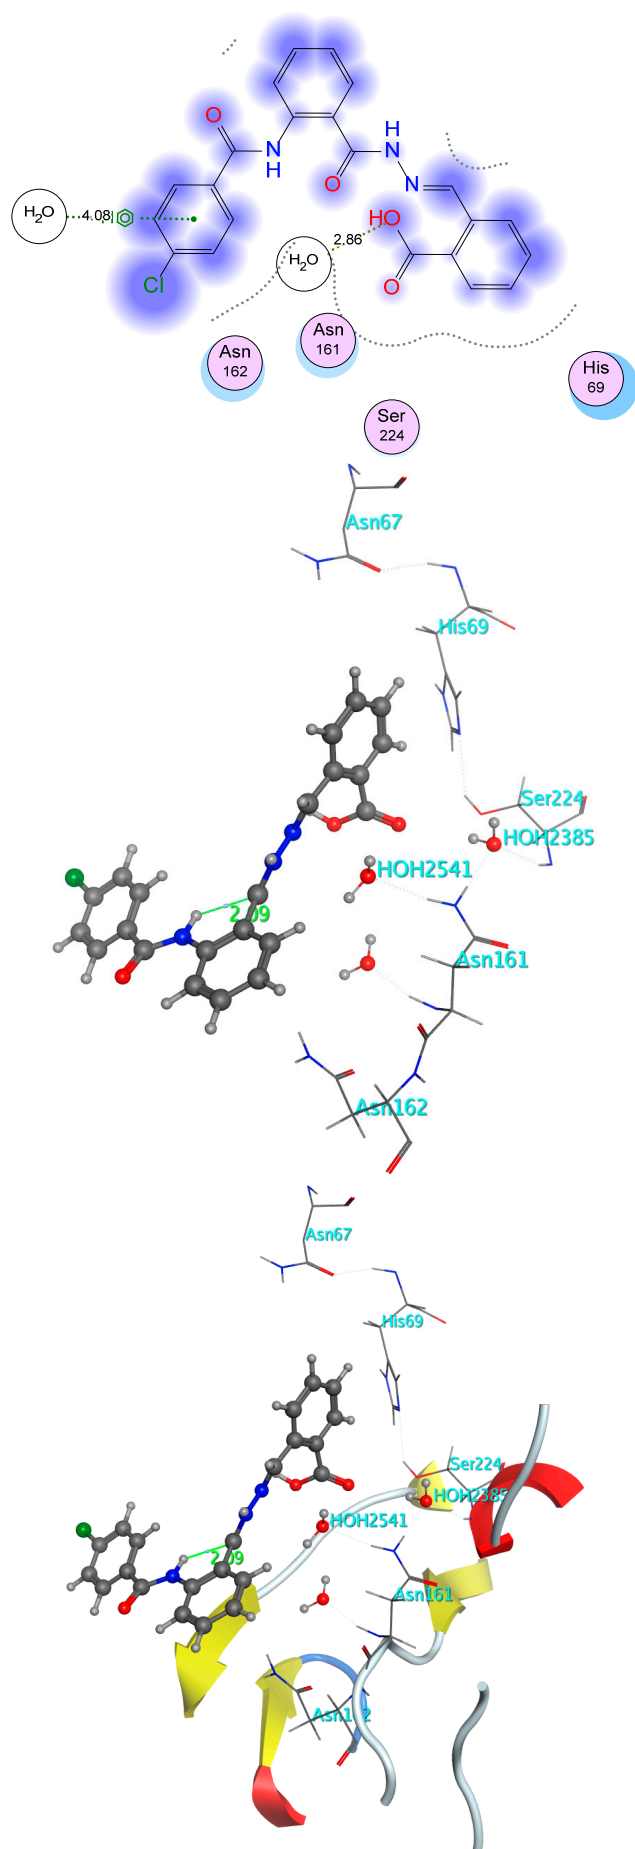Docking pose for compound **61** in the active site of Proteinase K

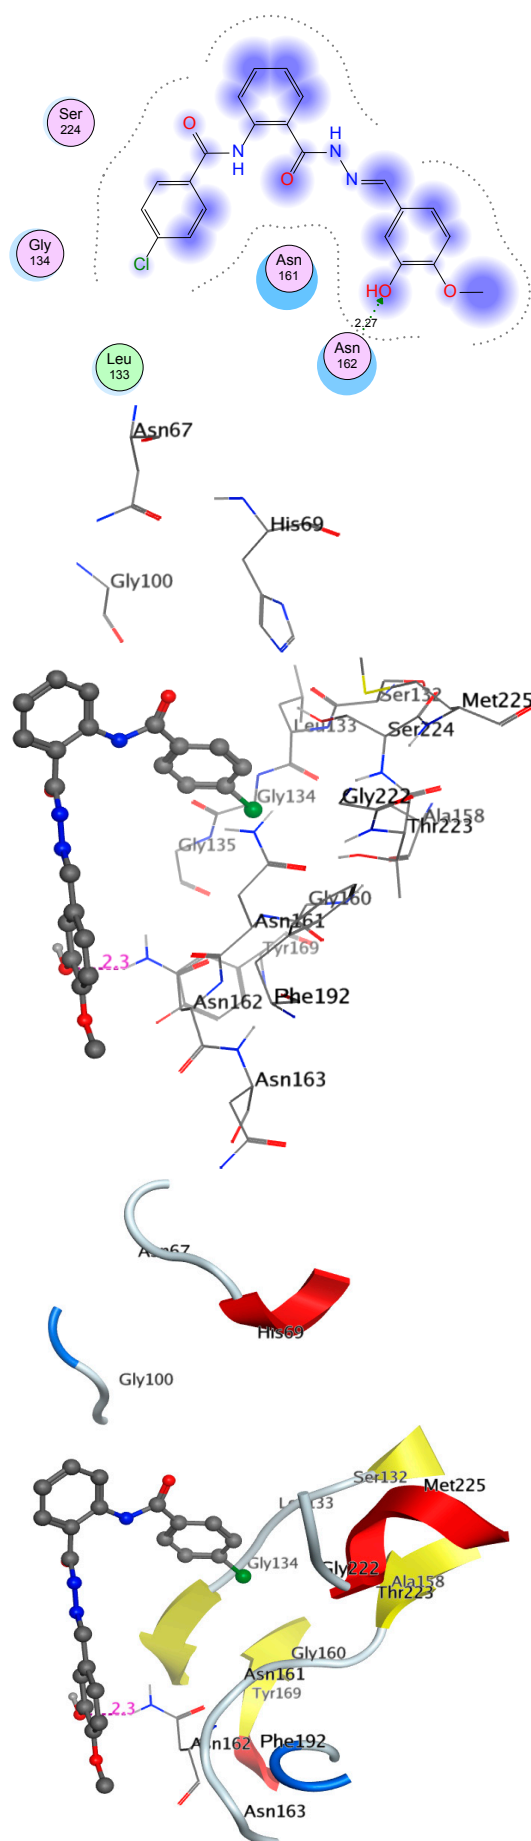Docking pose for compound **6m** in the active site of Proteinase K

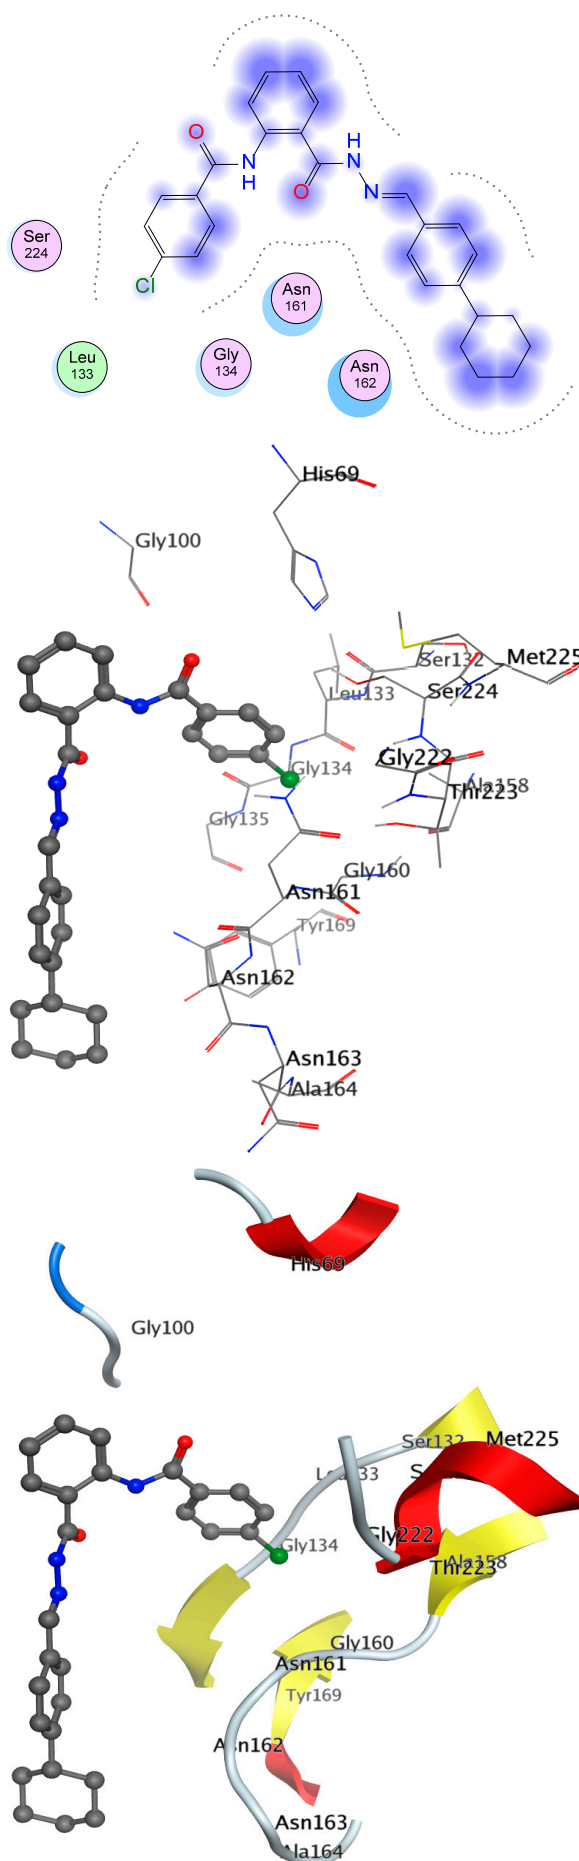Docking pose for compound **6n** in the active site of Proteinase K



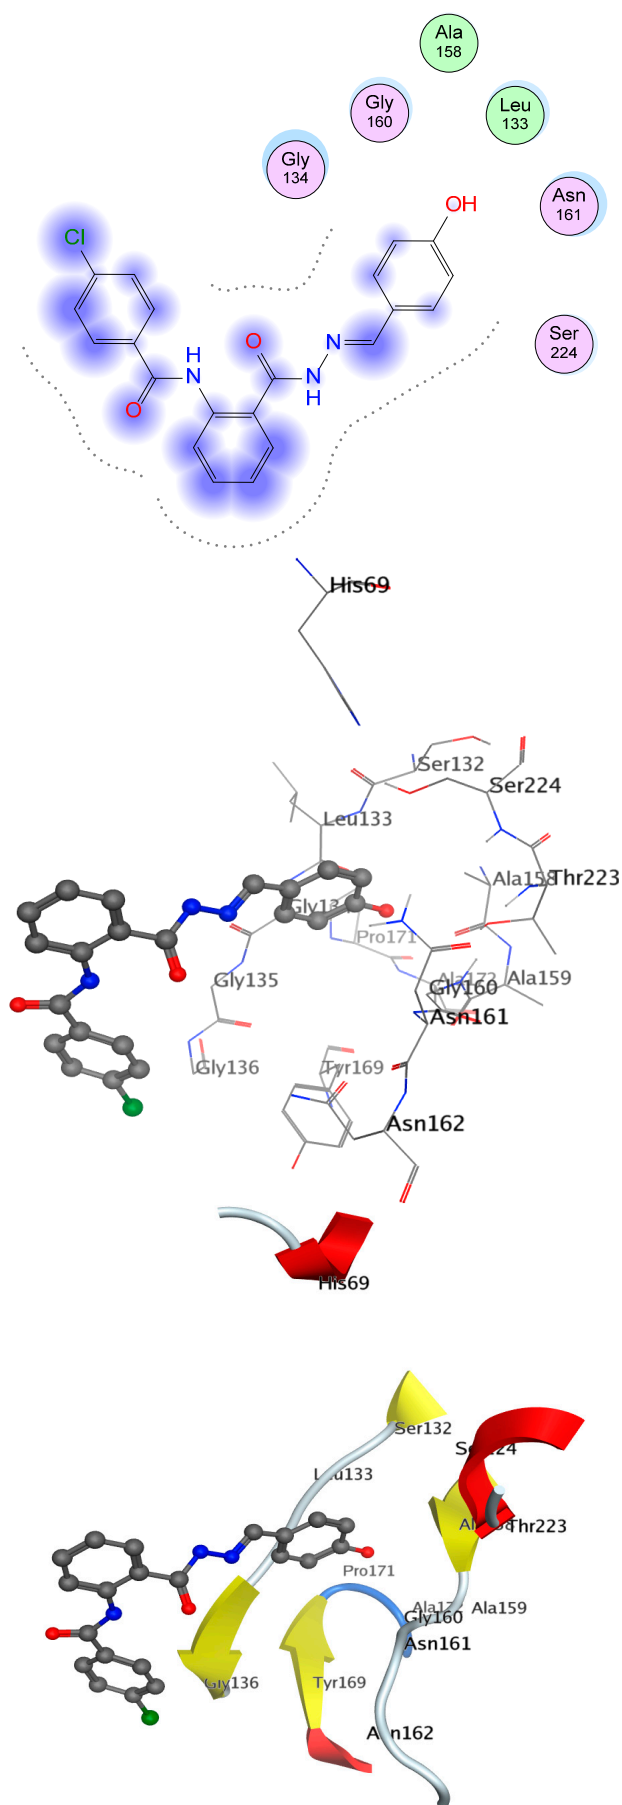

Docking pose for compound **60** in the active site of Proteinase K

**Figures S2.** Docking poses of compounds **6a–o** in active site of Proteinase K.

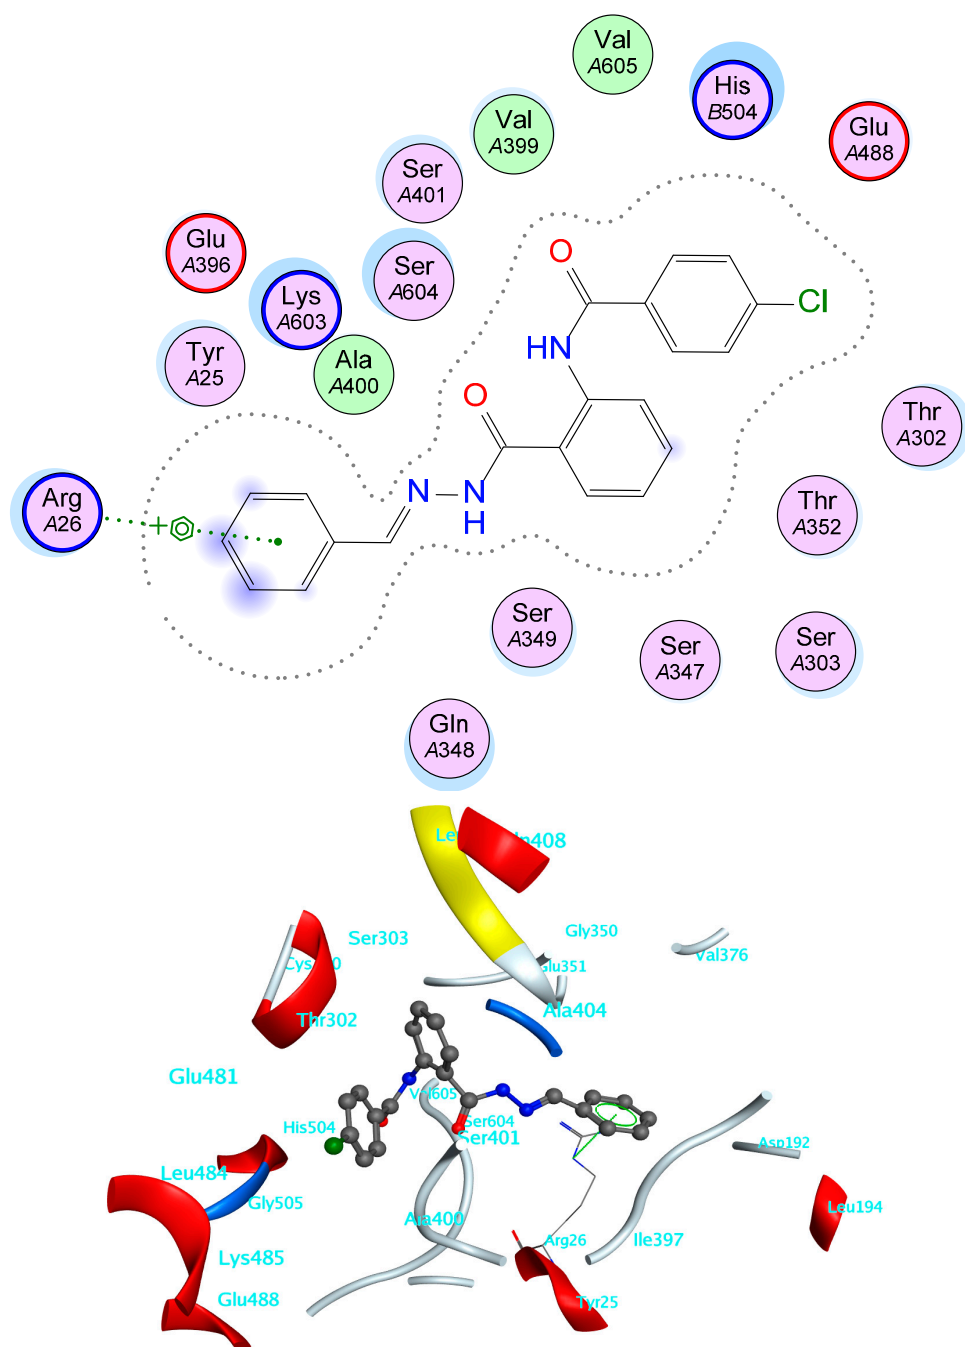

Docking pose in of **6a** in glucosamine-6-phosphate (GlcN6P) synthase

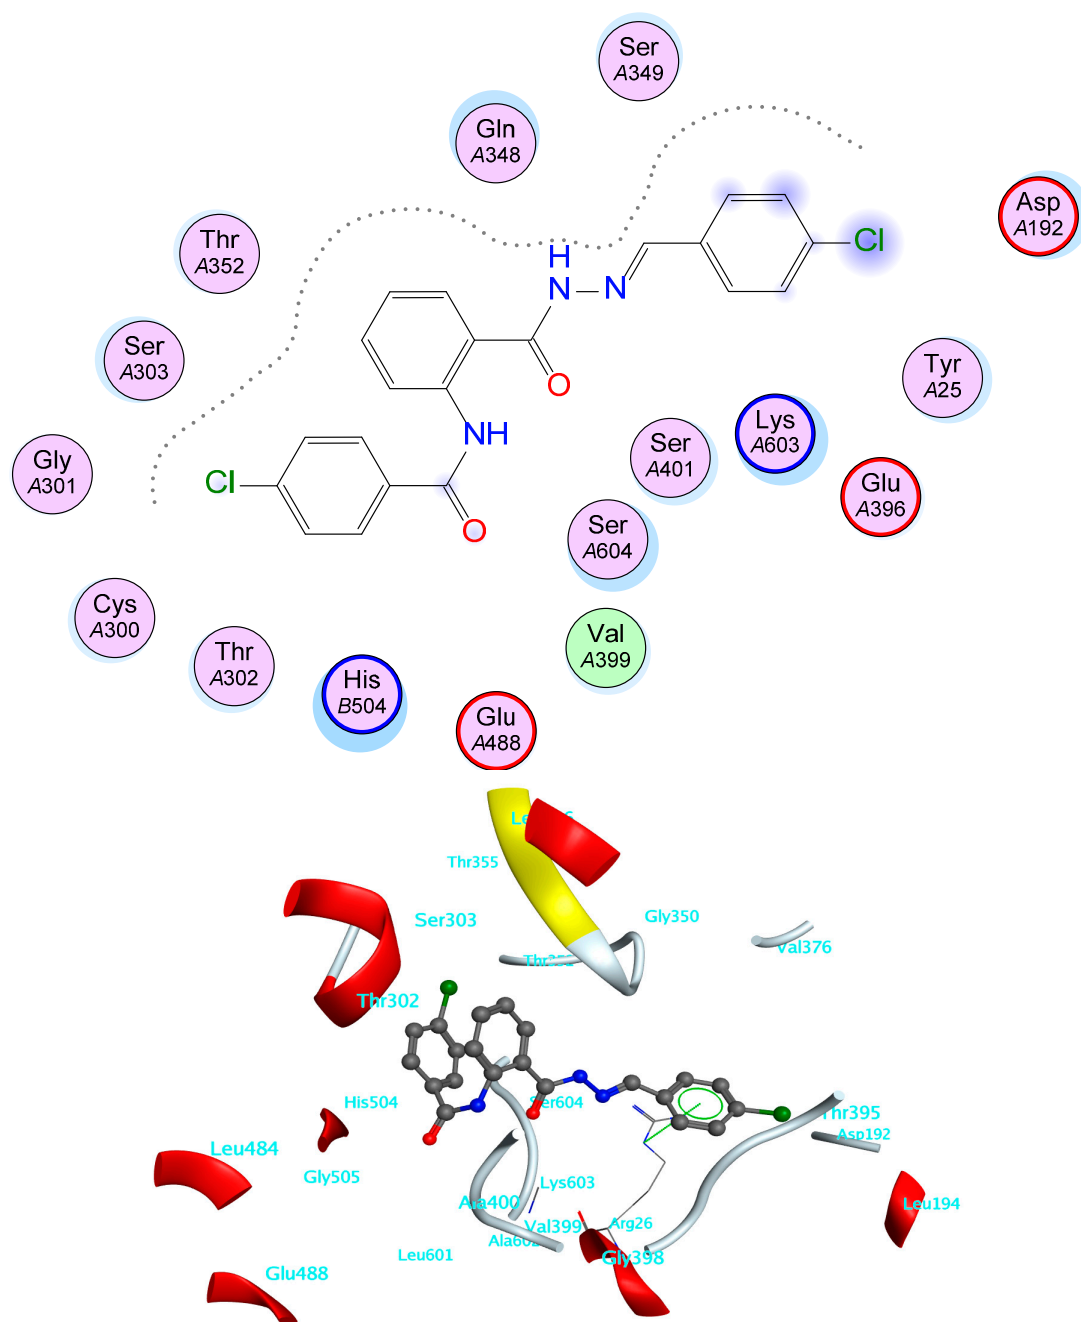Docking pose in of **6b** in glucosamine-6-phosphate (GlcN6P) synthase

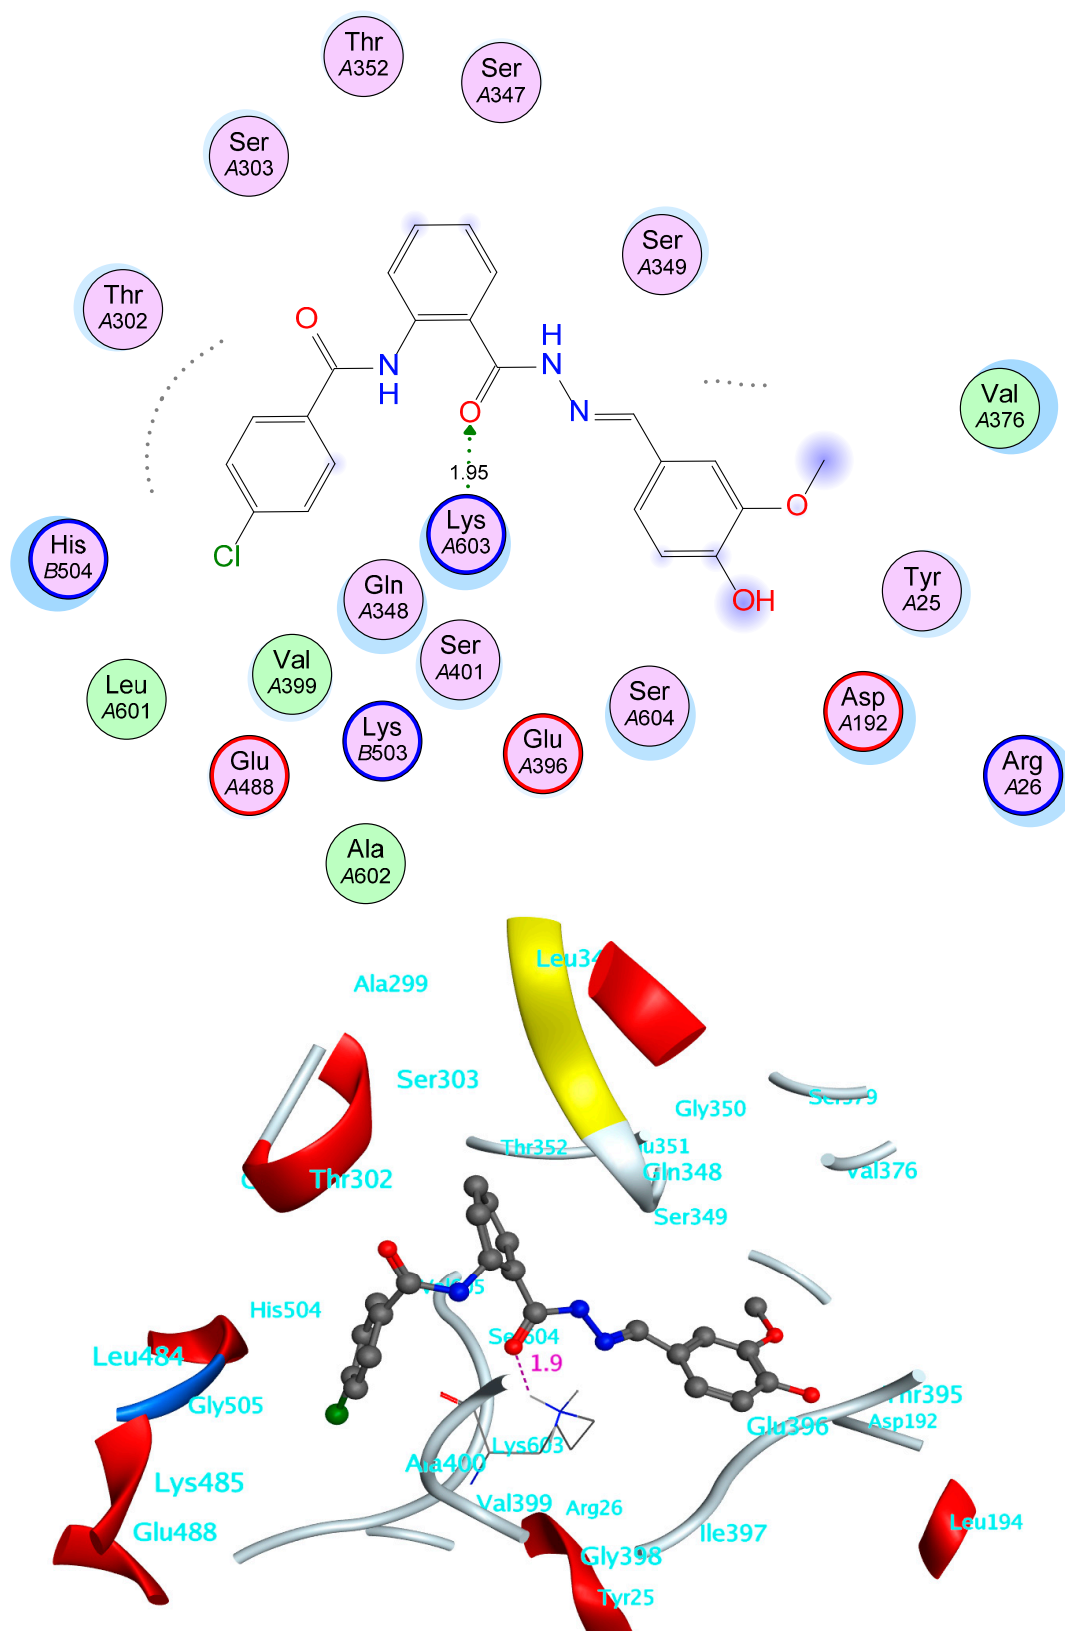

Docking pose in of **6c** in glucosamine-6-phosphate (GlcN6P) synthase

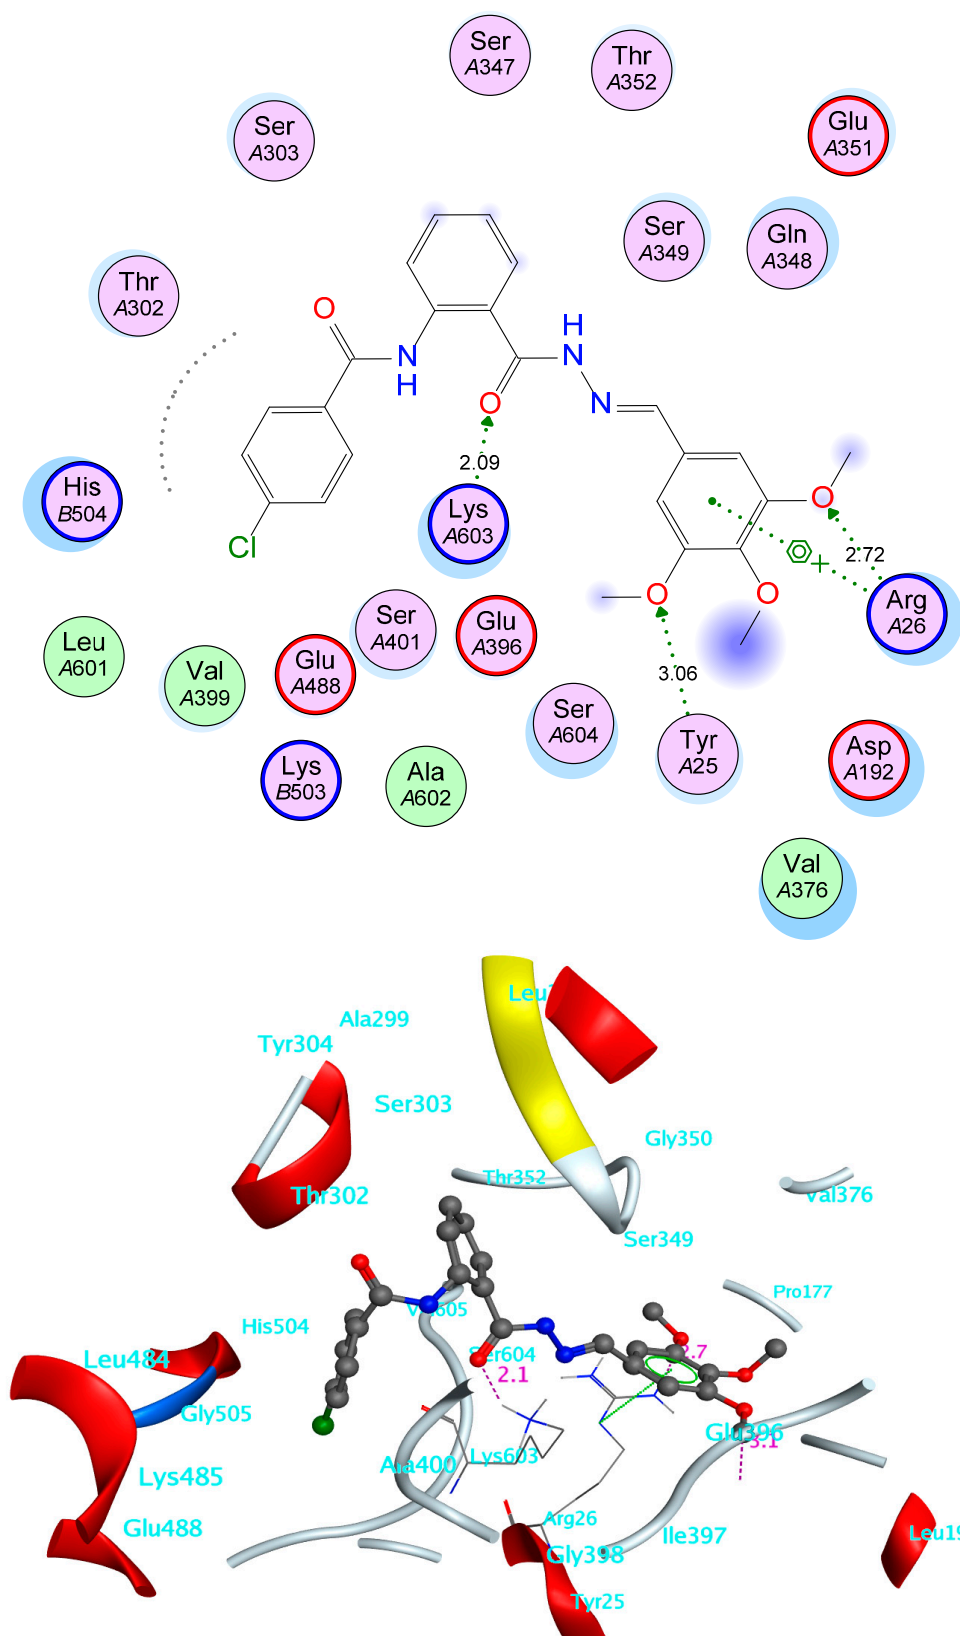

Docking pose in of **6d** in glucosamine-6-phosphate (GlcN6P) synthase

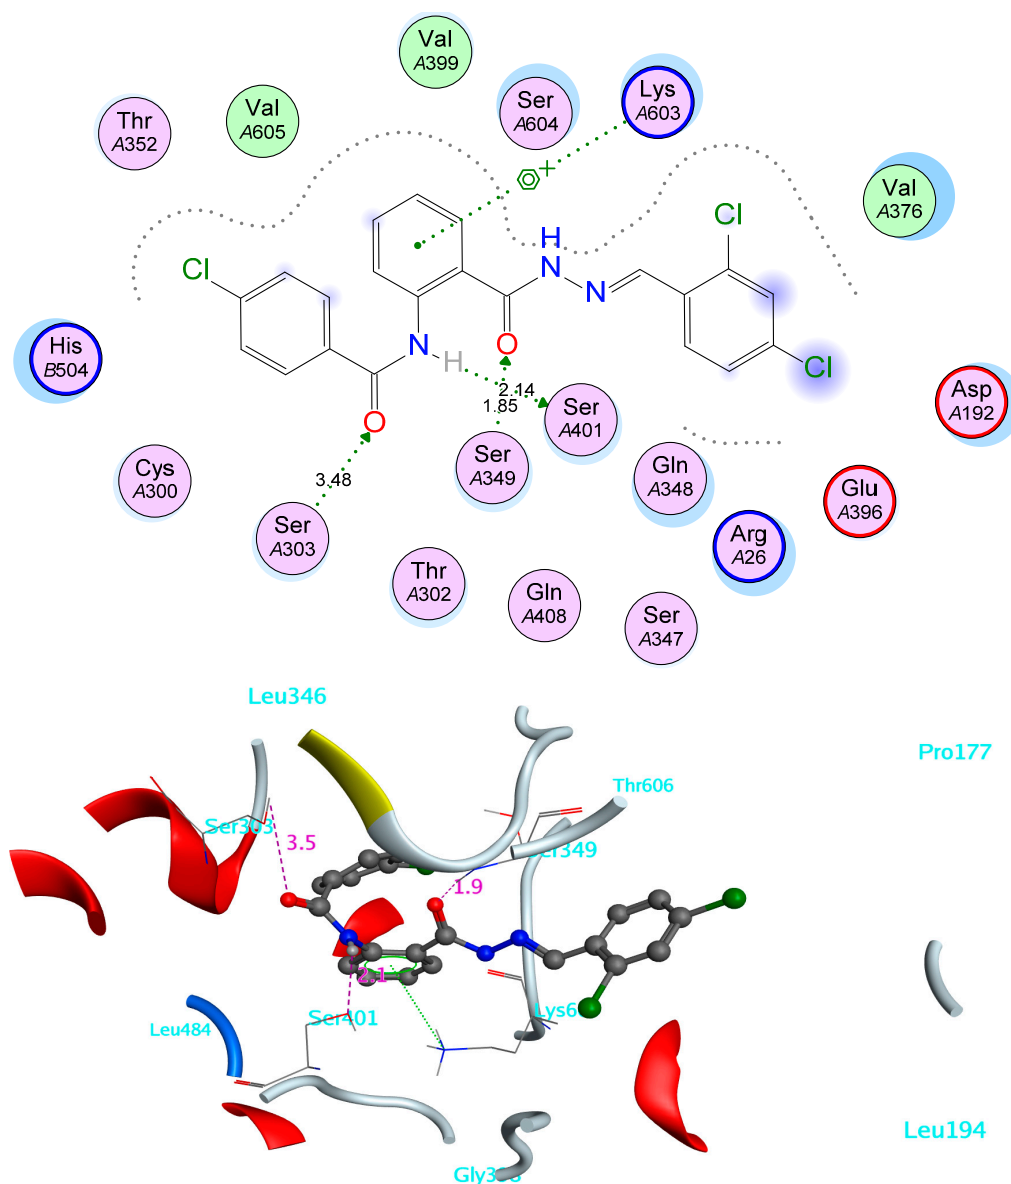

Docking pose in of **6e** in glucosamine-6-phosphate (GlcN6P) synthase

**Figures S3.** Docking poses of compounds **6a–e** in active site of glucosamine-6-phosphate (GlcN6P) synthase.
